# Supplementary material
Source: ML conference proceedings conference paper supplement (https://proceedings.mlr.press/v139/yang21a.html)
Supplement: Supplementary file 1 [file yang21a-supp.pdf]

## A. Definitions of quantities in the main text

### A.1. Full definitions of $\bar{\mathcal{U}}$ , $\bar{\mathcal{T}}$ , $\mathcal{A}_U$ , and $\mathcal{A}_T$ in Proposition 2

We first define functions  $m_1(\cdot), m_2(\cdot)$ , which could be understood as the limiting partial Stieltjes transforms of  $\mathbf{A}(\mathbf{q})$  (c.f. Definition 1).

**Definition 3** (Limiting partial Stieltjes transforms). *For  $\xi \in \mathbb{C}_+$  and  $\mathbf{q} \in \mathcal{Q}$  where*

$$\mathcal{Q} = \{(s_1, s_2, t_1, t_2, p) : |s_2 t_2| \leq \mu_1^2(1+p)^2/2\}, \quad (25)$$

*define functions  $F_1(\cdot, \cdot; \xi; \mathbf{q}, \psi_1, \psi_2, \mu_1, \mu_\star), F_2(\cdot, \cdot; \xi; \mathbf{q}, \psi_1, \psi_2, \mu_1, \mu_\star) : \mathbb{C} \times \mathbb{C} \rightarrow \mathbb{C}$  via:*

$$\begin{aligned} F_1(m_1, m_2; \xi; \mathbf{q}, \psi_1, \psi_2, \mu_1, \mu_\star) &\equiv \psi_1 \left( -\xi + s_1 - \mu_\star^2 m_2 + \frac{(1 + t_2 m_2)s_2 - \mu_1^2(1+p)^2 m_2}{(1 + s_2 m_1)(1 + t_2 m_2) - \mu_1^2(1+p)^2 m_1 m_2} \right)^{-1}, \\ F_2(m_1, m_2; \xi; \mathbf{q}, \psi_1, \psi_2, \mu_1, \mu_\star) &\equiv \psi_2 \left( -\xi + t_1 - \mu_\star^2 m_1 + \frac{(1 + s_2 m_1)t_2 - \mu_1^2(1+p)^2 m_1}{(1 + t_2 m_2)(1 + s_2 m_1) - \mu_1^2(1+p)^2 m_1 m_2} \right)^{-1}. \end{aligned}$$

*Let  $m_1(\cdot; \mathbf{q}; \psi), m_2(\cdot; \mathbf{q}; \psi) : \mathbb{C}_+ \rightarrow \mathbb{C}_+$  be defined, for  $\Im(\xi) \geq C$  a sufficiently large constant, as the unique solution of the equations*

$$\begin{aligned} m_1 &= F_1(m_1, m_2; \xi; \mathbf{q}, \psi_1, \psi_2, \mu_1, \mu_\star), \\ m_2 &= F_2(m_1, m_2; \xi; \mathbf{q}, \psi_1, \psi_2, \mu_1, \mu_\star) \end{aligned} \quad (26)$$

*subject to the condition  $|m_1| \leq \psi_1/\Im(\xi), |m_2| \leq \psi_2/\Im(\xi)$ . Extend this definition to  $\Im(\xi) > 0$  by requiring  $m_1, m_2$  to be analytic functions in  $\mathbb{C}_+$ .*

We next define the function  $g(\cdot)$  that will be shown to be the limiting log determinant of  $\mathbf{A}(\mathbf{q})$ .

**Definition 4** (Limiting log determinants). *For  $\mathbf{q} = (s_1, s_2, t_1, t_2, p)$  and  $\psi = (\psi_1, \psi_2)$ , define*

$$\begin{aligned} \Xi(\xi, z_1, z_2; \mathbf{q}; \psi) &\equiv \log[(s_2 z_1 + 1)(t_2 z_2 + 1) - \mu_1^2(1+p)^2 z_1 z_2] - \mu_\star^2 z_1 z_2 \\ &\quad + s_1 z_1 + t_1 z_2 - \psi_1 \log(z_1/\psi_1) - \psi_2 \log(z_2/\psi_2) - \xi(z_1 + z_2) - \psi_1 - \psi_2. \end{aligned} \quad (27)$$

*Let  $m_1(\xi; \mathbf{q}; \psi), m_2(\xi; \mathbf{q}; \psi)$  be defined as the analytic continuation of solution of Eq. (26) as defined in Definition 3. Define*

$$g(\xi; \mathbf{q}; \psi) = \Xi(\xi, m_1(\xi; \mathbf{q}; \psi), m_2(\xi; \mathbf{q}; \psi); \mathbf{q}; \psi). \quad (28)$$

We next give the definitions of  $\bar{\mathcal{U}}, \bar{\mathcal{T}}, \mathcal{A}_U$ , and  $\mathcal{A}_T$ .

**Definition 5** ( $\bar{\mathcal{U}}, \bar{\mathcal{T}}, \mathcal{A}_U$ , and  $\mathcal{A}_T$  in Proposition 2). *For any  $\lambda \in \Lambda_U$ , define*

$$\begin{aligned} \mathcal{A}_U(\lambda, \psi_1, \psi_2) &= - \lim_{u \rightarrow 0_+} \left[ \psi_1 \left( F_1^2 \mu_1^2 \partial_{s_1 s_2} + F_1^2 \partial_{s_1 p} + F_1^2 \partial_{s_1 t_2} + \tau^2 \partial_{s_1 t_1} \right) g(iu; \mathbf{q}; \psi) \right]_{\mathbf{q}=\mathbf{q}_U}, \\ \bar{\mathcal{U}}(\lambda, \psi_1, \psi_2) &= F_1^2 + \tau^2 - \lim_{u \rightarrow 0_+} \left[ \left( F_1^2 \mu_1^2 \partial_{s_2} + F_1^2 \partial_p + F_1^2 \partial_{t_2} + \tau^2 \partial_{t_1} \right) g(iu; \mathbf{q}; \psi) \right]_{\mathbf{q}=\mathbf{q}_U}, \\ \mathcal{A}_T(\lambda, \psi_1, \psi_2) &= - \lim_{u \rightarrow 0_+} \left[ \psi_1 \left( F_1^2 \mu_1^2 \partial_{s_1 s_2} + F_1^2 \partial_{s_1 p} + F_1^2 \partial_{s_1 t_2} + \tau^2 \partial_{s_1 t_1} \right) g(iu; \mathbf{q}; \psi) \right]_{\mathbf{q}=\mathbf{q}_T}, \\ \bar{\mathcal{T}}(\lambda, \psi_1, \psi_2) &= F_1^2 + \tau^2 - \lim_{u \rightarrow 0_+} \left[ \left( F_1^2 \mu_1^2 \partial_{s_2} + F_1^2 \partial_p + F_1^2 \partial_{t_2} + \tau^2 \partial_{t_1} \right) g(iu; \mathbf{q}; \psi) \right]_{\mathbf{q}=\mathbf{q}_T}, \end{aligned}$$

where  $\mathbf{q}_U = (\mu_\star^2 - \lambda \psi_1, \mu_1^2, \psi_2, 0, 0), \mathbf{q}_T = (\mu_\star^2 - \lambda \psi_1, \mu_1^2, 0, 0, 0)$ .

In the following, we give a simplified expression for  $\bar{\mathcal{U}}$  and  $\mathcal{A}_U$ .

**Remark 2** (Simplification of  $\bar{\mathcal{U}}$  and  $\mathcal{A}_U$ ). *Define  $\zeta, \bar{\lambda}$  as the rescaled version of  $\mu_1^2$  and  $\lambda$*

$$\zeta = \frac{\mu_1^2}{\mu_\star^2}, \quad \bar{\lambda} = \frac{\lambda}{\mu_\star^2}.$$

Let  $m_1(\cdot; \psi), m_2(\cdot; \psi) : \mathbb{C}_+ \rightarrow \mathbb{C}_+$  be defined, for  $\Im(\xi) \geq C$  a sufficiently large constant, as the unique solution of the equations

$$\begin{aligned} m_1 &= \psi_1 \left[ -\xi + (1 - \bar{\lambda}\psi_1) - m_2 + \frac{\zeta(1 - m_2)}{1 + \zeta m_1 - \zeta m_1 m_2} \right]^{-1}, \\ m_2 &= -\psi_2 \left[ \xi + \psi_2 - m_1 - \frac{\zeta m_1}{1 + \zeta m_1 - \zeta m_1 m_2} \right]^{-1}, \end{aligned} \quad (29)$$

subject to the condition  $|m_1| \leq \psi_1/\Im(\xi)$ ,  $|m_2| \leq \psi_2/\Im(\xi)$ . Extend this definition to  $\Im(\xi) > 0$  by requiring  $m_1, m_2$  to be analytic functions in  $\mathbb{C}_+$ . Let

$$\begin{aligned} \bar{m}_1 &= \lim_{u \rightarrow \infty} m_1(iu, \psi), \\ \bar{m}_2 &= \lim_{u \rightarrow \infty} m_2(iu, \psi). \end{aligned}$$

Define

$$\begin{aligned} \chi_1 &= \bar{m}_1 \zeta - \bar{m}_1 \bar{m}_2 \zeta + 1, \\ \chi_2 &= \bar{m}_1 - \psi_2 + \frac{\bar{m}_1 \zeta}{\chi_1}, \\ \chi_3 &= \bar{\lambda} \psi_1 + \bar{m}_2 - 1 + \frac{\zeta(\bar{m}_2 - 1)}{\chi_1}. \end{aligned}$$

Define two polynomials  $\mathcal{E}_1, \mathcal{E}_2$  as

$$\begin{aligned} \mathcal{E}_1(\psi_1, \psi_2, \bar{\lambda}, \zeta) &= \psi_1^2(\psi_2 \chi_1^4 + \psi_2 \chi_1^2 \zeta), \\ \mathcal{E}_2(\psi_1, \psi_2, \bar{\lambda}, \zeta) &= \psi_1^2(\chi_1^2 \chi_2^2 \bar{m}_2^2 \zeta - 2\chi_1^2 \chi_2^2 \bar{m}_2 \zeta + \chi_1^2 \chi_2^2 \zeta + \psi_2 \chi_1^2 - \psi_2 \bar{m}_1^2 \bar{m}_2^2 \zeta^3 + 2\psi_2 \bar{m}_1^2 \bar{m}_2 \zeta^3 - \psi_2 \bar{m}_1^2 \zeta^3 + \psi_2 \zeta), \\ \mathcal{E}_3(\psi_1, \psi_2, \bar{\lambda}, \zeta) &= -\chi_1^4 \chi_2^2 \chi_3^2 + \psi_1 \psi_2 \chi_1^4 + \psi_1 \chi_1^2 \chi_2^2 \bar{m}_2^2 \zeta^2 - 2\psi_1 \chi_1^2 \chi_2^2 \bar{m}_2 \zeta^2 + \psi_1 \chi_1^2 \chi_2^2 \zeta^2 \\ &\quad + \psi_2 \chi_1^2 \chi_3^2 \bar{m}_1^2 \zeta^2 + 2\psi_1 \psi_2 \chi_1^2 \zeta - \psi_1 \psi_2 \bar{m}_1^2 \bar{m}_2^2 \zeta^4 + 2\psi_1 \psi_2 \bar{m}_1^2 \bar{m}_2 \zeta^4 - \psi_1 \psi_2 \bar{m}_1^2 \zeta^4 + \psi_1 \psi_2 \zeta^2. \end{aligned}$$

Then

$$\begin{aligned} \bar{\mathcal{U}}(\bar{\lambda}, \psi_1, \psi_2) &= -\frac{(\bar{m}_2 - 1)(\tau^2 \chi_1(\psi_1, \psi_2, \bar{\lambda}, \zeta) + F_1^2)}{\chi_1(\psi_1, \psi_2, \bar{\lambda}, \zeta)}, \\ \mathcal{A}_U(\bar{\lambda}, \psi_1, \psi_2) &= \frac{\tau^2 \mathcal{E}_1(\psi_1, \psi_2, \bar{\lambda}, \zeta) + F_1^2 \mathcal{E}_1(\psi_1, \psi_2, \bar{\lambda}, \zeta)}{\mathcal{E}_2(\psi_1, \psi_2, \bar{\lambda}, \zeta)}. \end{aligned}$$

**Remark 3** (Simplification of  $\bar{\mathcal{T}}$  and  $\mathcal{A}_T$ ). Define  $\zeta, \bar{\lambda}$  as the rescaled version of  $\mu_1^2$  and  $\lambda$

$$\zeta = \frac{\mu_1^2}{\mu_\star^2}, \quad \bar{\lambda} = \frac{\lambda}{\mu_\star^2}.$$

Let  $m_1(\cdot; \psi), m_2(\cdot; \psi) : \mathbb{C}_+ \rightarrow \mathbb{C}_+$  be defined, for  $\Im(\xi) \geq C$  a sufficiently large constant, as the unique solution of the equations

$$\begin{aligned} m_1 &= \psi_1 \left[ -\xi + (1 - \bar{\lambda}\psi_1) - m_2 + \frac{\zeta(1 - m_2)}{1 + \zeta m_1 - \zeta m_1 m_2} \right]^{-1}, \\ m_2 &= -\psi_2 \left[ \xi + m_1 + \frac{\zeta m_1}{1 + \zeta m_1 - \zeta m_1 m_2} \right]^{-1}, \end{aligned} \quad (30)$$

subject to the condition  $|m_1| \leq \psi_1/\Im(\xi)$ ,  $|m_2| \leq \psi_2/\Im(\xi)$ . Extend this definition to  $\Im(\xi) > 0$  by requiring  $m_1, m_2$  to be analytic functions in  $\mathbb{C}_+$ . Let

$$\begin{aligned} \bar{m}_1 &= \lim_{u \rightarrow \infty} m_1(iu, \psi), \\ \bar{m}_2 &= \lim_{u \rightarrow \infty} m_2(iu, \psi). \end{aligned}$$

Define

$$\chi_4 = \bar{m}_1 + \frac{\bar{m}_1 \zeta}{\chi_1(\bar{m}_1, \bar{m}_2, \zeta)},$$

and

$$\begin{aligned}\chi_1 &= \bar{m}_1\zeta - \bar{m}_1\bar{m}_2\zeta + 1, \\ \chi_3 &= \bar{\lambda}\psi_1 + \bar{m}_2 - 1 + \frac{\zeta(\bar{m}_2 - 1)}{\chi_1},\end{aligned}$$

where the definitions of  $\chi_1, \chi_3$  are the same as in Remark 2. Define three polynomials  $\mathcal{E}_3, \mathcal{E}_4, \mathcal{E}_5$  as

$$\begin{aligned}\mathcal{E}_4(\psi_1, \psi_2, \bar{\lambda}, \zeta) &= \psi_1 \left( \psi_2 \chi_1^4 \chi_4^3 + \chi_1^4 \chi_4^2 \bar{m}_1^3 \bar{m}_2^2 \zeta^3 - 2\chi_1^4 \chi_4^2 \bar{m}_1^3 \bar{m}_2 \zeta^3 + \chi_1^4 \chi_4^2 \bar{m}_1^3 \zeta^3 + 2\chi_1^3 \chi_4^2 \bar{m}_1^3 \bar{m}_2^2 \zeta^2 \right. \\ &\quad - 4\chi_1^3 \chi_4^2 \bar{m}_1^3 \bar{m}_2 \zeta^2 + 2\chi_1^3 \chi_4^2 \bar{m}_1^3 \zeta^2 - \psi_2 \chi_1^3 \chi_4^2 \bar{m}_1 \zeta + \chi_1^2 \chi_4^2 \bar{m}_1^3 \bar{m}_2^2 \zeta - 2\chi_1^2 \chi_4^2 \bar{m}_1^3 \bar{m}_2 \zeta \\ &\quad + \chi_1^2 \chi_4^2 \bar{m}_1^3 \zeta + \psi_2 \chi_1^2 \chi_4^2 \bar{m}_1 \zeta - \psi_2 \chi_1^2 \bar{m}_1^5 \bar{m}_2^2 \zeta^5 + 2\psi_2 \chi_1^2 \bar{m}_1^5 \bar{m}_2 \zeta^5 - \psi_2 \chi_1^2 \bar{m}_1^5 \zeta^5 \\ &\quad - 2\psi_2 \chi_1 \bar{m}_1^5 \bar{m}_2^2 \zeta^4 + 4\psi_2 \chi_1 \bar{m}_1^5 \bar{m}_2 \zeta^4 - 2\psi_2 \chi_1 \bar{m}_1^5 \zeta^4 - \psi_2 \bar{m}_1^5 \bar{m}_2^2 \zeta^3 \\ &\quad \left. + 2\psi_2 \bar{m}_1^5 \bar{m}_2 \zeta^3 - \psi_2 \bar{m}_1^5 \zeta^3 \right), \\ \mathcal{E}_5(\psi_1, \psi_2, \bar{\lambda}, \zeta) &= \bar{m}_1 \left( \zeta + 1 + \bar{m}_1 \zeta - \bar{m}_1 \bar{m}_2 \zeta \right)^2 \left( -\chi_1^4 \chi_3^2 \chi_4^2 \bar{m}_1^2 \right. \\ &\quad + \psi_1 \psi_2 \chi_1^4 \chi_4^2 - 2\psi_1 \psi_2 \chi_1^3 \chi_4 \bar{m}_1 \zeta + \psi_2 \chi_1^2 \chi_3^2 \bar{m}_1^4 \zeta^2 + \psi_1 \chi_1^2 \chi_4^2 \bar{m}_1^2 \bar{m}_2^2 \zeta^2 \\ &\quad - 2\psi_1 \chi_1^2 \chi_4^2 \bar{m}_1^2 \bar{m}_2 \zeta^2 + \psi_1 \chi_1^2 \chi_4^2 \bar{m}_1^2 \zeta^2 + 2\psi_1 \psi_2 \chi_1^2 \chi_4 \bar{m}_1 \zeta + \psi_1 \psi_2 \chi_1^2 \bar{m}_1^2 \zeta^2 \\ &\quad \left. - 2\psi_1 \psi_2 \chi_1 \bar{m}_1^2 \zeta^2 - \psi_1 \psi_2 \bar{m}_1^4 \bar{m}_2^2 \zeta^4 + 2\psi_1 \psi_2 \bar{m}_1^4 \bar{m}_2 \zeta^4 - \psi_1 \psi_2 \bar{m}_1^4 \zeta^4 + \psi_1 \psi_2 \bar{m}_1^2 \zeta^2 \right), \\ \mathcal{E}_6(\psi_1, \psi_2, \bar{\lambda}, \zeta) &= \chi_1^2 \chi_4^2 \psi_1 \psi_2 \left( \chi_4 \chi_1^2 - \bar{m}_1 \chi_1 \zeta + \bar{m}_1 \zeta \right) \left( \bar{m}_1 \zeta - \bar{m}_1 \bar{m}_2 \zeta + 1 \right)^2.\end{aligned}$$

Then

$$\begin{aligned}\bar{\mathcal{T}}(\bar{\lambda}, \psi_1, \psi_2) &= -\frac{(\bar{m}_2 - 1) (\tau^2 \chi_1(\psi_1, \psi_2, \bar{\lambda}, \zeta) + F_1^2)}{\chi_1(\psi_1, \psi_2, \bar{\lambda}, \zeta)}, \\ \mathcal{A}_T(\bar{\lambda}, \psi_1, \psi_2) &= -\psi_1 \frac{F_1^2 \mathcal{E}_4(\psi_1, \psi_2, \bar{\lambda}, \zeta) + \tau^2 \mathcal{E}_6(\psi_1, \psi_2, \bar{\lambda}, \zeta)}{\mathcal{E}_5(\psi_1, \psi_2, \bar{\lambda}, \zeta)}.\end{aligned}$$

## A.2. Definitions of $\mathcal{R}$ and $\mathcal{A}$

In this section, we present the expression of  $\mathcal{R}$  and  $\mathcal{A}$  from Mei & Montanari (2019) which are used in our results and plots.

**Definition 6** (Formula for the prediction error of minimum norm interpolator). *Define*

$$\zeta = \mu_1^2 / \mu_\star^2, \quad \rho = F_1^2 / \tau^2$$

Let the functions  $\nu_1, \nu_2 : \mathbb{C}_+ \rightarrow \mathbb{C}_+$  be uniquely defined by the following conditions: (i)  $\nu_1, \nu_2$  are analytic on  $\mathbb{C}_+$ ; (ii) For  $\Im(\xi) > 0$ ,  $\nu_1(\xi), \nu_2(\xi)$  satisfy the following equations

$$\begin{aligned}\nu_1 &= \psi_1 \left( -\xi - \nu_2 - \frac{\zeta^2 \nu_2}{1 - \zeta^2 \nu_1 \nu_2} \right)^{-1}, \\ \nu_2 &= \psi_2 \left( -\xi - \nu_1 - \frac{\zeta^2 \nu_1}{1 - \zeta^2 \nu_1 \nu_2} \right)^{-1};\end{aligned}\tag{31}$$

(iii)  $(\nu_1(\xi), \nu_2(\xi))$  is the unique solution of these equations with  $|\nu_1(\xi)| \leq \psi_1 / \Im(\xi)$ ,  $|\nu_2(\xi)| \leq \psi_2 / \Im(\xi)$  for  $\Im(\xi) > C$ , with  $C$  a sufficiently large constant.

Let

$$\chi \equiv \lim_{u \rightarrow 0} \nu_1(iu) \cdot \nu_2(iu),\tag{32}$$

and

$$\begin{aligned}E_0(\zeta, \psi_1, \psi_2) &\equiv -\chi^5 \zeta^6 + 3\chi^4 \zeta^4 + (\psi_1 \psi_2 - \psi_2 - \psi_1 + 1) \chi^3 \zeta^6 - 2\chi^3 \zeta^4 - 3\chi^3 \zeta^2 \\ &\quad + (\psi_1 + \psi_2 - 3\psi_1 \psi_2 + 1) \chi^2 \zeta^4 + 2\chi^2 \zeta^2 + \chi^2 + 3\psi_1 \psi_2 \chi \zeta^2 - \psi_1 \psi_2, \\ E_1(\zeta, \psi_1, \psi_2) &\equiv \psi_2 \chi^3 \zeta^4 - \psi_2 \chi^2 \zeta^2 + \psi_1 \psi_2 \chi \zeta^2 - \psi_1 \psi_2, \\ E_2(\zeta, \psi_1, \psi_2) &\equiv \chi^5 \zeta^6 - 3\chi^4 \zeta^4 + (\psi_1 - 1) \chi^3 \zeta^6 + 2\chi^3 \zeta^4 + 3\chi^3 \zeta^2 + (-\psi_1 - 1) \chi^2 \zeta^4 - 2\chi^2 \zeta^2 - \chi^2.\end{aligned}\tag{33}$$

Then the expression for the asymptotic risk of minimum norm interpolator gives

$$\mathcal{R}(\psi_1, \psi_2) = F_1^2 \frac{E_1(\zeta, \psi_1, \psi_2)}{E_0(\zeta, \psi_1, \psi_2)} + \tau^2 \frac{E_2(\zeta, \psi_1, \psi_2)}{E_0(\zeta, \psi_1, \psi_2)} + \tau^2.$$

The expression for the norm of the minimum norm interpolator gives

$$\begin{aligned} A_1 &= \frac{\rho}{1+\rho} \left[ -\chi^2(\chi\zeta^4 - \chi\zeta^2 + \psi_2\zeta^2 + \zeta^2 - \chi\psi_2\zeta^4 + 1) \right] + \frac{1}{1+\rho} \left[ \chi^2(\chi\zeta^2 - 1)(\chi^2\zeta^4 - 2\chi\zeta^2 + \zeta^2 + 1) \right], \\ A_0 &= -\chi^5\zeta^6 + 3\chi^4\zeta^4 + (\psi_1\psi_2 - \psi_2 - \psi_1 + 1)\chi^3\zeta^6 - 2\chi^3\zeta^4 - 3\chi^3\zeta^2 \\ &\quad + (\psi_1 + \psi_2 - 3\psi_1\psi_2 + 1)\chi^2\zeta^4 + 2\chi^2\zeta^2 + \chi^2 + 3\psi_1\psi_2\chi\zeta^2 - \psi_1\psi_2, \\ \mathcal{A}(\psi_1, \psi_2) &= \psi_1(F_1^2 + \tau^2)A_1/(\mu_*^2 A_0). \end{aligned}$$

## B. Experimental setup for simulations in Figure 2

In this section, we present additional details for Figure 2. We choose  $y_i = \langle \mathbf{x}_i, \beta \rangle$  for some  $\|\beta\|_2^2 = 1$ , the ReLU activation function  $\sigma(x) = \max\{x, 0\}$ , and  $\psi_1 = N/d = 2.5$  and  $\psi_2 = n/d = 1.5$ .

For the theoretical curves (in solid lines), we choose  $\lambda \in [0.426, 2]$ , so that  $\mathcal{A}_U(\lambda) \in [0, 15]$ , and plot the parametric curve  $(\mathcal{A}_U(\lambda), \bar{\mathcal{U}}(\lambda) + \lambda\mathcal{A}_U(\lambda))$  for the uniform convergence. For the uniform convergence over interpolators, we choose  $\lambda \in [0.21, 2]$  so that  $\mathcal{A}_T(\lambda) \in [6.4, 15]$ , and plot  $(\mathcal{A}_T(\lambda), \bar{\mathcal{T}}(\lambda) + \lambda\mathcal{A}_T(\lambda))$ . The definitions of these theoretical predictions are given in Definition 5, Remark 2 and Remark 3

For the empirical simulations (in dots), first recall that in Proposition 2, we defined

$$\begin{aligned} \mathbf{a}_U(\lambda) &= \arg \max_{\mathbf{a}} \left[ R(\mathbf{a}) - \hat{R}_n(\mathbf{a}) - \psi_1 \lambda \|\mathbf{a}\|_2^2 \right], \\ \mathbf{a}_T(\lambda) &= \arg \max_{\mathbf{a}} \inf_{\mu} \left[ R(\mathbf{a}) - \lambda \psi_1 \|\mathbf{a}\|_2^2 + 2\langle \mu, \mathbf{Z}\mathbf{a} - \mathbf{y}/\sqrt{d} \rangle \right]. \end{aligned}$$

After picking a value of  $\lambda$ , we sample 20 independent problem instances, with the number of features  $N = 500$ , number of samples  $n = 300$ , covariate dimension  $d = 200$ . We compute the corresponding  $(\psi_1 \|\mathbf{a}_U\|_2^2, R(\mathbf{a}_U) - \hat{R}_n(\mathbf{a}_U))$  and  $(\psi_1 \|\mathbf{a}_T\|_2^2, R(\mathbf{a}_T))$  for each instance. Then, we plot the empirical mean and  $1/\sqrt{20}$  times the empirical standard deviation (around the mean) of each coordinate.

## C. Proof of Proposition 1

The proof of Proposition 1 contains two parts: standard uniform convergence  $U$  and uniform convergence over interpolators  $T$ . The proof for the two cases are essentially the same, both based on the fact that strong duality holds for quadratic program with single quadratic constraint (c.f. [Boyd & Vandenberghe \(2004\)](#), Appendix A.1).

### C.1. Standard uniform convergence $U$

Recall that the uniform convergence bound  $U$  is defined as in Eq. (4)

$$U(A, N, n, d) = \sup_{(N/d)\|\mathbf{a}\|_2^2 \leq A} \left( R(\mathbf{a}) - \hat{R}_n(\mathbf{a}) \right).$$

Since the maximization problem in (4) is a quadratic program with a single quadratic constraint, the strong duality holds. So we have

$$\sup_{(N/d)\|\mathbf{a}\|_2^2 \leq A^2} R(\mathbf{a}) - \hat{R}_n(\mathbf{a}) = \inf_{\lambda \geq 0} \sup_{\mathbf{a}} \left[ R(\mathbf{a}) - \hat{R}_n(\mathbf{a}) - \psi_1 \lambda (\|\mathbf{a}\|_2^2 - \psi_1^{-1} A) \right].$$

Finally, by the definition of  $\bar{U}$  as in Eq. (20), we get

$$U(A, N, n, d) = \inf_{\lambda \geq 0} \left[ \bar{U}(\lambda, N, n, d) + \lambda A \right].$$

## C.2. Uniform convergence over interpolators $T$

Without loss of generality, we consider the regime when  $N > n$ .

Recall that the uniform convergence over interpolators  $T$  is defined as in Eq. (5)

$$T(A, N, n, d) = \sup_{(N/d)\|\mathbf{a}\|_2^2 \leq A, \widehat{R}_n(\mathbf{a})=0} R(\mathbf{a}).$$

When the set  $\{\mathbf{a} \in \mathbb{R}^N : (N/d)\|\mathbf{a}\|_2^2 \leq A, \widehat{R}_n(\mathbf{a}) = 0\}$  is empty, we have

$$T(A, N, n, d) = \inf_{\lambda \geq 0} [\overline{T}(\lambda, N, n, d) + \lambda A] = -\infty.$$

In the following, we assume that the set  $\{\mathbf{a} \in \mathbb{R}^N : (N/d)\|\mathbf{a}\|_2^2 \leq A, \widehat{R}_n(\mathbf{a}) = 0\}$  is non-empty, i.e., there exists  $\mathbf{a} \in \mathbb{R}^N$  such that  $\widehat{R}_n(\mathbf{a}) = 0$  and  $(N/d)\|\mathbf{a}\|_2^2 \leq A$ .

Let  $m$  be the dimension of the null space of  $\mathbf{Z} \in \mathbb{R}^{n \times N}$ , i.e.  $m = \dim(\{\mathbf{u} : \mathbf{Z}\mathbf{u} = \mathbf{0}\})$ . Note that  $\mathbf{Z} \in \mathbb{R}^{n \times n}$  and  $N > n$ , we must have  $N - n \leq m \leq N$ . We let  $\mathbf{R} \in \mathbb{R}^{N \times m}$  be a matrix whose column space gives the null space of matrix  $\mathbf{Z}$ . Let  $\mathbf{a}_0$  be the minimum norm interpolating solution (whose existence is given by the assumption that  $\{\mathbf{a} \in \mathbb{R}^N : \widehat{R}_n(\mathbf{a}) = 0\}$  is non-empty)

$$\mathbf{a}_0 = \lim_{\lambda \rightarrow 0^+} \arg \min_{\mathbf{a} \in \mathbb{R}^N} [\widehat{R}_n(\mathbf{a}) + \lambda \|\mathbf{a}\|_2^2] = \arg \min_{\mathbf{a} \in \mathbb{R}^N : \widehat{R}_n(\mathbf{a})=0} \|\mathbf{a}\|_2^2.$$

Then we have

$$\{\mathbf{a} \in \mathbb{R}^N : \widehat{R}_n(\mathbf{a}) = 0\} = \{\mathbf{a} \in \mathbb{R}^N : \mathbf{y} = \sqrt{d}\mathbf{Z}\mathbf{a}\} = \{\mathbf{R}\mathbf{u} + \mathbf{a}_0 : \mathbf{u} \in \mathbb{R}^m\}.$$

Then  $T$  can be rewritten as a maximization problem in terms of  $\mathbf{u}$ :

$$\begin{aligned} \sup_{(N/d)\|\mathbf{a}\|_2^2 \leq A, \widehat{R}_n(\mathbf{a})=0} R(\mathbf{a}) &= \sup_{\mathbf{u} \in \mathbb{R}^m : \|\mathbf{R}\mathbf{u} + \mathbf{a}_0\|_2^2 \leq \psi_1^{-1}A} [\langle \mathbf{R}\mathbf{u} + \mathbf{a}_0, \mathbf{U}(\mathbf{R}\mathbf{u} + \mathbf{a}_0) \rangle - 2\langle \mathbf{R}\mathbf{u} + \mathbf{a}_0, \mathbf{v} \rangle + \mathbb{E}(y^2)] \\ &= R(\mathbf{a}_0) + \sup_{\mathbf{u} \in \mathbb{R}^m : \|\mathbf{R}\mathbf{u} + \mathbf{a}_0\|_2^2 \leq \psi_1^{-1}A} [\langle \mathbf{u}, \mathbf{R}^\top \mathbf{U} \mathbf{R} \mathbf{u} \rangle + 2\langle \mathbf{R}\mathbf{u}, \mathbf{U} \mathbf{a}_0 - \mathbf{v} \rangle]. \end{aligned}$$

Note that the optimization problem only has non-feasible region when  $A > (N/d)\|\mathbf{a}_0\|_2^2$ . By strong duality of quadratic programs with a single quadratic constraint, we have

$$\begin{aligned} &\sup_{\mathbf{u} \in \mathbb{R}^m : \|\mathbf{R}\mathbf{u} + \mathbf{a}_0\|_2^2 \leq \psi_1^{-1}A} [\langle \mathbf{u}, \mathbf{R}^\top \mathbf{U} \mathbf{R} \mathbf{u} \rangle + 2\langle \mathbf{R}\mathbf{u}, \mathbf{U} \mathbf{a}_0 - \mathbf{v} \rangle] \\ &= \inf_{\lambda \geq 0} \sup_{\mathbf{u} \in \mathbb{R}^m} [\langle \mathbf{u}, \mathbf{R}^\top \mathbf{U} \mathbf{R} \mathbf{u} \rangle + 2\langle \mathbf{R}\mathbf{u}, \mathbf{U} \mathbf{a}_0 - \mathbf{v} \rangle - \lambda(\psi_1 \|\mathbf{R}\mathbf{u} + \mathbf{a}_0\|_2^2 - A)]. \end{aligned}$$

The maximization over  $\mathbf{u}$  can be restated as the maximization over  $\mathbf{a}$ :

$$R(\mathbf{a}_0) + \sup_{\mathbf{u} \in \mathbb{R}^m} [\langle \mathbf{u}, \mathbf{R}^\top \mathbf{U} \mathbf{R} \mathbf{u} \rangle + 2\langle \mathbf{R}\mathbf{u}, \mathbf{U} \mathbf{a}_0 - \mathbf{v} \rangle - \lambda \psi_1 \|\mathbf{R}\mathbf{u} + \mathbf{a}_0\|_2^2] = \sup_{\mathbf{a} : \widehat{R}_n(\mathbf{a})=0} [R(\mathbf{a}) - \lambda \psi_1 \|\mathbf{a}\|_2^2].$$

Moreover, since  $\sup_{\mathbf{a} : \widehat{R}_n(\mathbf{a})=0} [R(\mathbf{a}) - \lambda \psi_1 \|\mathbf{a}\|_2^2]$  is a quadratic programming with linear constraints, we have

$$\sup_{\mathbf{a} : \widehat{R}_n(\mathbf{a})=0} [R(\mathbf{a}) - \lambda \psi_1 \|\mathbf{a}\|_2^2] = \sup_{\mathbf{a}} \inf_{\boldsymbol{\mu}} [R(\mathbf{a}) - \lambda \psi_1 \|\mathbf{a}\|_2^2 + 2\langle \boldsymbol{\mu}, \mathbf{Z}\mathbf{a} - \mathbf{y}/\sqrt{d} \rangle].$$

Combining all the equality above and the definition of  $\bar{T}$  as in Eq. (21), we have

$$\begin{aligned}
 T(A, N, n, d) &= \sup_{(N/d)\|\mathbf{a}\|_2^2 \leq A, \hat{R}_n(\mathbf{a})=0} R(\mathbf{a}) \\
 &= R(\mathbf{a}_0) + \sup_{\mathbf{u} \in \mathbb{R}^m: \|\mathbf{R}\mathbf{u} + \mathbf{a}_0\|_2^2 \leq \psi_1^{-1}A} \left[ \langle \mathbf{u}, \mathbf{R}^\top \mathbf{U} \mathbf{R} \mathbf{u} \rangle + 2\langle \mathbf{R}\mathbf{u}, \mathbf{U}\mathbf{a}_0 - \mathbf{v} \rangle \right] \\
 &= R(\mathbf{a}_0) + \inf_{\lambda \geq 0} \sup_{\mathbf{u}} \left[ \langle \mathbf{u}, \mathbf{R}^\top \mathbf{U} \mathbf{R} \mathbf{u} \rangle + 2\langle \mathbf{R}\mathbf{u}, \mathbf{U}\mathbf{a}_0 - \mathbf{v} \rangle - \lambda(\psi_1 \|\mathbf{R}\mathbf{u} + \mathbf{a}_0\|_2^2 - A) \right] \\
 &= \inf_{\lambda \geq 0} \left\{ \lambda A + R(\mathbf{a}_0) + \sup_{\mathbf{u}} \left[ \langle \mathbf{u}, \mathbf{R}^\top \mathbf{U} \mathbf{R} \mathbf{u} \rangle + 2\langle \mathbf{R}\mathbf{u}, \mathbf{U}\mathbf{a}_0 - \mathbf{v} \rangle - \lambda\psi_1 \|\mathbf{R}\mathbf{u} + \mathbf{a}_0\|_2^2 \right] \right\} \\
 &= \inf_{\lambda \geq 0} \left\{ \lambda A + \sup_{\mathbf{a}: \hat{R}_n(\mathbf{a})=0} \left[ R(\mathbf{a}) - \lambda\psi_1 \|\mathbf{a}\|_2^2 \right] \right\} \\
 &= \inf_{\lambda \geq 0} \left\{ \lambda A + \sup_{\mathbf{a}} \inf_{\boldsymbol{\mu}} \left[ R(\mathbf{a}) - \lambda\psi_1 \|\mathbf{a}\|_2^2 + 2\langle \boldsymbol{\mu}, \mathbf{Z}\mathbf{a} - \mathbf{y}/\sqrt{d} \rangle \right] \right\} \\
 &= \inf_{\lambda \geq 0} \left[ \bar{T}(\lambda, N, n, d) + \lambda A \right].
 \end{aligned}$$

This concludes the proof.

## D. Proof of Proposition 2

Note that the definitions of  $\bar{U}$  and  $\bar{T}$  as in Eq. (20) and (21) depend on  $\boldsymbol{\beta} = \boldsymbol{\beta}^{(d)}$ , where  $\boldsymbol{\beta}^{(d)}$  gives the coefficients of the target function  $f_d(\mathbf{x}) = \langle \mathbf{x}, \boldsymbol{\beta}^{(d)} \rangle$ . Suppose we explicitly write their dependence on  $\boldsymbol{\beta} = \boldsymbol{\beta}^{(d)}$ , i.e.,  $\bar{U}(\lambda, N, n, d) = \bar{U}(\boldsymbol{\beta}, \lambda, N, n, d)$  and  $\bar{T}(\lambda, N, n, d) = \bar{T}(\boldsymbol{\beta}, \lambda, N, n, d)$ , then we can see that for any fixed  $\boldsymbol{\beta}_\star$  and  $\tilde{\boldsymbol{\beta}}$  with  $\|\tilde{\boldsymbol{\beta}}\|_2 = \|\boldsymbol{\beta}_\star\|_2$ , we have  $\bar{U}(\boldsymbol{\beta}_\star, \lambda, N, n, d) \stackrel{d}{=} \bar{U}(\tilde{\boldsymbol{\beta}}, \lambda, N, n, d)$  and  $\bar{T}(\boldsymbol{\beta}_\star, \lambda, N, n, d) \stackrel{d}{=} \bar{T}(\tilde{\boldsymbol{\beta}}, \lambda, N, n, d)$  where the randomness comes from  $\mathbf{X}, \boldsymbol{\Theta}, \varepsilon$ . This is by the fact that the distribution of  $\mathbf{x}_i$ 's and  $\boldsymbol{\theta}_a$ 's are rotationally invariant. As a consequence, for any fixed deterministic  $\boldsymbol{\beta}_\star$ , if we take  $\boldsymbol{\beta} \sim \text{Unif}(\mathbb{S}^{d-1}(\|\boldsymbol{\beta}_\star\|_2))$ , we have

$$\begin{aligned}
 \bar{U}(\boldsymbol{\beta}_\star, \lambda, N, n, d) &\stackrel{d}{=} \bar{U}(\boldsymbol{\beta}, \lambda, N, n, d), \\
 \bar{T}(\boldsymbol{\beta}_\star, \lambda, N, n, d) &\stackrel{d}{=} \bar{T}(\boldsymbol{\beta}, \lambda, N, n, d).
 \end{aligned}$$

where the randomness comes from  $\mathbf{X}, \boldsymbol{\Theta}, \varepsilon, \boldsymbol{\beta}$ .

Consequently, as long as we are able to show the equation

$$\bar{U}(\boldsymbol{\beta}, \lambda, N, n, d) = \bar{U}(\lambda, \psi_1, \psi_2) + o_{d, \mathbb{P}}(1)$$

for random  $\boldsymbol{\beta} \sim \text{Unif}(\mathbb{S}^{n-1}(F_1))$ , this equation will also hold for any deterministic  $\boldsymbol{\beta}_\star$  with  $\|\boldsymbol{\beta}_\star\|_2^2 = F_1^2$ . Vice versa for  $\bar{T}$ ,  $\|\bar{\mathbf{a}}_U\|_2^2$  and  $\|\bar{\mathbf{a}}_T\|_2^2$ .

As a result, in the following, we work with the assumption that  $\boldsymbol{\beta} = \boldsymbol{\beta}^{(d)} \sim \text{Unif}(\mathbb{S}^{d-1}(F_1))$ . That is, in proving Proposition 2, we replace Assumption 1 by Assumption 6 below. By the argument above, as long as Proposition 2 holds under Assumption 6, it also holds under the original assumption, i.e., Assumption 1.

**Assumption 6** (Linear Target Function). *We assume that  $f_d \in L^2(\mathbb{S}^{d-1}(\sqrt{d}))$  with  $f_d(\mathbf{x}) = \langle \boldsymbol{\beta}^{(d)}, \mathbf{x} \rangle$ , where  $\boldsymbol{\beta}^{(d)} \sim \text{Unif}(\mathbb{S}^{d-1}(F_1))$ .*

### D.1. Expansions

Denote  $\mathbf{v} = (v_i)_{i \in [N]} \in \mathbb{R}^N$  and  $\mathbf{U} = (U_{ij})_{i,j \in [N]} \in \mathbb{R}^{N \times N}$  where their elements are defined via

$$\begin{aligned}
 v_i &\equiv \mathbb{E}_{\varepsilon, \mathbf{x}}[y\sigma(\langle \mathbf{x}, \boldsymbol{\theta}_i \rangle / \sqrt{d})], \\
 U_{ij} &\equiv \mathbb{E}_{\mathbf{x}}[\sigma(\langle \mathbf{x}, \boldsymbol{\theta}_i \rangle / \sqrt{d})\sigma(\langle \mathbf{x}, \boldsymbol{\theta}_j \rangle / \sqrt{d})].
 \end{aligned}$$

Here,  $y = \langle \mathbf{x}, \boldsymbol{\beta} \rangle + \varepsilon$ , where  $\boldsymbol{\beta} \sim \text{Unif}(\mathbb{S}^{d-1}(F_1))$ ,  $\mathbf{x} \sim \text{Unif}(\mathbb{S}^{d-1}(\sqrt{d}))$ ,  $\varepsilon \sim \mathcal{N}(0, \tau^2)$ , and  $(\boldsymbol{\theta}_j)_{j \in [N]} \sim_{iid} \text{Unif}(\mathbb{S}^{d-1}(\sqrt{d}))$  are mutually independent. The expectations are taken with respect to the test sample  $\mathbf{x} \sim \text{Unif}(\mathbb{S}^{d-1}(\sqrt{d}))$  and  $\varepsilon \sim \mathcal{N}(0, \tau^2)$  (especially, the expectations are conditional on  $\boldsymbol{\beta}$  and  $(\boldsymbol{\theta}_i)_{i \in [N]}$ ).

Moreover, we denote  $\mathbf{y} = (y_1, \dots, y_n)^\top \in \mathbb{R}^n$  where  $y_i = \langle \mathbf{x}_i, \boldsymbol{\beta} \rangle + \varepsilon_i$ . Recall that  $(\mathbf{x}_i)_{i \in [n]} \sim_{iid} \text{Unif}(\mathbb{S}^{d-1}(\sqrt{d}))$  and  $(\varepsilon_i)_{i \in [n]} \sim_{iid} \mathcal{N}(0, \tau^2)$  are mutually independent and independent from  $\boldsymbol{\beta} \sim \text{Unif}(\mathbb{S}^{d-1}(\sqrt{d}))$ . We further denote  $\mathbf{Z} = (Z_{ij})_{i \in [n], j \in [N]}$  where its elements are defined via

$$Z_{ij} = \sigma(\langle \mathbf{x}_i, \boldsymbol{\theta}_j \rangle / \sqrt{d}) / \sqrt{d}.$$

The population risk (1) can be reformulated as

$$R(\mathbf{a}) = \langle \mathbf{a}, \mathbf{U}\mathbf{a} \rangle - 2\langle \mathbf{a}, \mathbf{v} \rangle + \mathbb{E}[y^2],$$

where  $\mathbf{a} = (a_1, \dots, a_N) \in \mathbb{R}^N$ . The empirical risk (2) can be reformulated as

$$\hat{R}_n(\mathbf{a}) = \psi_2^{-1} \langle \mathbf{a}, \mathbf{Z}^\top \mathbf{Z} \mathbf{a} \rangle - 2\psi_2^{-1} \frac{\langle \mathbf{Z}^\top \mathbf{y}, \mathbf{a} \rangle}{\sqrt{d}} + \frac{1}{n} \|\mathbf{y}\|_2^2.$$

By the Appendix A in Mei & Montanari (2019) (we include in the Appendix F for completeness), we can expand  $\sigma(x)$  in terms of Gegenbauer polynomials

$$\sigma(x) = \sum_{k=0}^{\infty} \lambda_{d,k}(\sigma) B(d, k) Q_k^{(d)}(\sqrt{d} \cdot x),$$

where  $Q_k^{(d)}$  is the  $k$ 'th Gegenbauer polynomial in  $d$  dimensions,  $B(d, k)$  is the dimension of the space of polynomials on  $\mathbb{S}^{d-1}(\sqrt{d})$  with degree exactly  $k$ . Finally,  $\lambda_{d,k}(\sigma)$  is the  $k$ 'th Gegenbauer coefficient. More details of this expansion can be found in Appendix F.

By the properties of Gegenbauer polynomials (c.f. Appendix F.2), we have

$$\begin{aligned} \mathbb{E}_{\mathbf{x} \sim \text{Unif}(\mathbb{S}^{d-1}(\sqrt{d}))} [\mathbf{x} Q_k(\langle \mathbf{x}, \boldsymbol{\theta}_i \rangle)] &= \mathbf{0}, & \forall k \neq 1, \\ \mathbb{E}_{\mathbf{x} \sim \text{Unif}(\mathbb{S}^{d-1}(\sqrt{d}))} [\mathbf{x} Q_1(\langle \mathbf{x}, \boldsymbol{\theta}_i \rangle)] &= \boldsymbol{\theta}_i / d, & k = 1. \end{aligned}$$

As a result, we have

$$v_i = \mathbb{E}_{\varepsilon, \mathbf{x}} [y \sigma(\langle \mathbf{x}, \boldsymbol{\theta}_i \rangle / \sqrt{d})] = \sum_{k=0}^{\infty} \lambda_{d,k}(\sigma) B(d, k) \mathbb{E}_{\mathbf{x}} [\langle \mathbf{x}, \boldsymbol{\beta} \rangle Q_k^{(d)}(\sqrt{d} \cdot x)] = \lambda_{d,1}(\sigma) \langle \boldsymbol{\theta}_i, \boldsymbol{\beta} \rangle. \quad (34)$$

## D.2. Removing the perturbations

By Lemma 6 and 7 as in Appendix D.6, we have the following decomposition

$$\mathbf{U} = \mu_1^2 \mathbf{Q} + \mu_\star^2 \mathbf{I}_N + \boldsymbol{\Delta}, \quad (35)$$

with  $\mathbf{Q} = \boldsymbol{\Theta} \boldsymbol{\Theta}^\top / d$ ,  $\mathbb{E}[\|\boldsymbol{\Delta}\|_{\text{op}}^2] = o_d(1)$ , and  $\mu_1^2$  and  $\mu_\star^2$  are given in Assumption 2.

In the following, we would like to show that  $\boldsymbol{\Delta}$  has vanishing effects in the asymptotics of  $\bar{U}$ ,  $\bar{T}$ ,  $\|\bar{\mathbf{a}}_U\|_2^2$  and  $\|\bar{\mathbf{a}}_T\|_2^2$ .

For this purpose, we denote

$$\begin{aligned} \mathbf{U}_c &= \mu_1^2 \mathbf{Q} + \mu_\star^2 \mathbf{I}_N, \\ R_c(\mathbf{a}) &= \langle \mathbf{a}, \mathbf{U}_c \mathbf{a} \rangle - 2\langle \mathbf{a}, \mathbf{v} \rangle + \mathbb{E}[y^2], \\ \hat{R}_{c,n}(\mathbf{a}) &= \langle \mathbf{a}, \psi_2^{-1} \mathbf{Z}^\top \mathbf{Z} \mathbf{a} \rangle - 2\langle \mathbf{a}, \psi_2^{-1} \mathbf{Z}^\top \mathbf{y} / \sqrt{d} \rangle + \mathbb{E}[y^2], \\ \bar{U}_c(\lambda, N, n, d) &= \sup_{\mathbf{a}} \left( R_c(\mathbf{a}) - \hat{R}_{c,n}(\mathbf{a}) - \psi_1 \lambda \|\mathbf{a}\|_2^2 \right), \\ \bar{T}_c(\lambda, N, n, d) &= \sup_{\mathbf{a}} \inf_{\boldsymbol{\mu}} \left[ R_c(\mathbf{a}) - \lambda \psi_1 \|\mathbf{a}\|_2^2 + 2\langle \boldsymbol{\mu}, \mathbf{Z} \mathbf{a} - \mathbf{y} / \sqrt{d} \rangle \right]. \end{aligned} \quad (36)$$

For a fixed  $\lambda \in \Lambda_U$ , note we have

$$\begin{aligned}\bar{U}_c(\lambda, N, n, d) &= \sup_{\mathbf{a}} \left( \langle \mathbf{a}, (\mathbf{U}_c - \psi_2^{-1} \mathbf{Z}^\top \mathbf{Z} - \psi_1 \lambda \mathbf{I}_N) \mathbf{a} \rangle - 2 \langle \mathbf{a}, \mathbf{v} - \psi_2^{-1} \frac{\mathbf{Z}^\top \mathbf{y}}{\sqrt{d}} \rangle \right) \\ &= \sup_{\mathbf{a}} \left( \langle \mathbf{a}, \bar{\mathbf{M}} \mathbf{a} \rangle - 2 \langle \mathbf{a}, \bar{\mathbf{v}} \rangle \right)\end{aligned}\quad (37)$$

where  $\bar{\mathbf{M}} = \mathbf{U}_c - \psi_2^{-1} \mathbf{Z}^\top \mathbf{Z} - \psi_1 \lambda \mathbf{I}_N$  and  $\bar{\mathbf{v}} = \mathbf{v} - \psi_2^{-1} \mathbf{Z}^\top \mathbf{y} / \sqrt{d}$ . When  $\mathbf{X}, \Theta$  are such that the good event in Assumption 4 happens (which says that  $\bar{\mathbf{M}} \preceq -\varepsilon \mathbf{I}_N$  for some  $\varepsilon > 0$ ), the inner maximization can be uniquely achieved at

$$\bar{\mathbf{a}}_{U,c}(\lambda) = \arg \max_{\mathbf{a}} \left( \langle \mathbf{a}, \bar{\mathbf{M}} \mathbf{a} \rangle - 2 \langle \mathbf{a}, \bar{\mathbf{v}} \rangle \right) = \bar{\mathbf{M}}^{-1} \bar{\mathbf{v}}. \quad (38)$$

and when the good event  $\{\|\Delta\|_{\text{op}} \leq \varepsilon/2\}$  also happens, the maximizer in the definition of  $\bar{U}(\lambda, N, n, d)$  (c.f. Eq. (20)) can be uniquely achieved at

$$\bar{\mathbf{a}}_U(\lambda) = \arg \max_{\mathbf{a}} \left( \langle \mathbf{a}, (\bar{\mathbf{M}} + \Delta) \mathbf{a} \rangle - 2 \langle \mathbf{a}, \bar{\mathbf{v}} \rangle \right) = (\bar{\mathbf{M}} + \Delta)^{-1} \bar{\mathbf{v}}.$$

Note we have

$$\bar{\mathbf{a}}_U(\lambda) - \bar{\mathbf{a}}_{U,c}(\lambda) = (\bar{\mathbf{M}} + \Delta)^{-1} \bar{\mathbf{v}} - \bar{\mathbf{M}}^{-1} \bar{\mathbf{v}} = (\bar{\mathbf{M}} + \Delta)^{-1} \Delta \bar{\mathbf{M}}^{-1} \bar{\mathbf{v}},$$

so by the fact that  $\|\Delta\|_{\text{op}} = o_{d,\mathbb{P}}(1)$ , we have

$$\|\bar{\mathbf{a}}_U(\lambda) - \bar{\mathbf{a}}_{U,c}(\lambda)\|_2 \leq \|(\bar{\mathbf{M}} + \Delta)^{-1} \Delta\|_{\text{op}} \|\bar{\mathbf{a}}_{U,c}(\lambda)\|_2 = o_{d,\mathbb{P}}(1) \|\bar{\mathbf{a}}_{U,c}(\lambda)\|_2.$$

This gives  $\|\bar{\mathbf{a}}_U(\lambda)\|_2^2 = (1 + o_{d,\mathbb{P}}(1)) \|\bar{\mathbf{a}}_{U,c}(\lambda)\|_2^2$ .

Moreover, by the fact that  $\|\Delta\|_{\text{op}} = o_{d,\mathbb{P}}(1)$ , we have

$$\begin{aligned}\bar{U}_c(\lambda, N, n, d) &= \sup_{\mathbf{a}} \left( R(\mathbf{a}) - \hat{R}_n(\mathbf{a}) - \psi_1 \lambda \|\mathbf{a}\|_2^2 - \langle \mathbf{a}, \Delta \mathbf{a} \rangle \right) + \mathbb{E}[y^2] - \|\mathbf{y}\|_2^2 / n \\ &= \bar{U}(\lambda, N, n, d) + o_{d,\mathbb{P}}(1) (\|\bar{\mathbf{a}}_{U,c}(\lambda)\|_2^2 + 1).\end{aligned}$$

As a consequence, as long as we can prove the asymptotics of  $\bar{U}_c$  and  $\|\bar{\mathbf{a}}_{U,c}(\lambda)\|_2^2$ , it also gives the asymptotics of  $\bar{U}$  and  $\|\bar{\mathbf{a}}_U(\lambda)\|_2^2$ . Vice versa for  $\bar{T}$  and  $\|\bar{\mathbf{a}}_T(\lambda)\|_2^2$ .

### D.3. The asymptotics of $\bar{U}_c$ and $\psi_1 \|\bar{\mathbf{a}}_{U,c}(\lambda)\|_2^2$

In the following, we derive the asymptotics of  $\bar{U}_c(\lambda, N, n, d)$  and  $\psi_1 \|\bar{\mathbf{a}}_{U,c}(\lambda)\|_2^2$ . When we refer to  $\bar{\mathbf{a}}_{U,c}(\lambda)$ , it is always well defined with high probability, since it can be well defined under the condition that the good event in Assumption 4 happens. Note that this good event only depend on  $\mathbf{X}, \Theta$  and is independent of  $\beta, \varepsilon$ .

By Eq. (37) and (38), simple calculation shows that

$$\begin{aligned}\bar{U}_c(\lambda, N, n, d) &\equiv - \langle \bar{\mathbf{v}}, \bar{\mathbf{M}}^{-1} \bar{\mathbf{v}} \rangle = -\Psi_1 - \Psi_2 - \Psi_3, \\ \|\bar{\mathbf{a}}_{U,c}(\lambda)\|_2^2 &\equiv \langle \bar{\mathbf{v}}, \bar{\mathbf{M}}^{-2} \bar{\mathbf{v}} \rangle = \Phi_1 + \Phi_2 + \Phi_3,\end{aligned}$$

where

$$\begin{aligned}\Psi_1 &= \langle \bar{\mathbf{v}}, \bar{\mathbf{M}}^{-1} \bar{\mathbf{v}} \rangle, & \Phi_1 &= \langle \bar{\mathbf{v}}, \bar{\mathbf{M}}^{-2} \bar{\mathbf{v}} \rangle, \\ \Psi_2 &= -2\psi_2^{-1} \left\langle \frac{\mathbf{Z}^\top \mathbf{y}}{\sqrt{d}}, \bar{\mathbf{M}}^{-1} \bar{\mathbf{v}} \right\rangle, & \Phi_2 &= -2\psi_2^{-1} \left\langle \frac{\mathbf{Z}^\top \mathbf{y}}{\sqrt{d}}, \bar{\mathbf{M}}^{-2} \bar{\mathbf{v}} \right\rangle, \\ \Psi_3 &= \psi_2^{-2} \left\langle \frac{\mathbf{Z}^\top \mathbf{y}}{\sqrt{d}}, \bar{\mathbf{M}}^{-1} \frac{\mathbf{Z}^\top \mathbf{y}}{\sqrt{d}} \right\rangle, & \Phi_3 &= \psi_2^{-2} \left\langle \frac{\mathbf{Z}^\top \mathbf{y}}{\sqrt{d}}, \bar{\mathbf{M}}^{-2} \frac{\mathbf{Z}^\top \mathbf{y}}{\sqrt{d}} \right\rangle.\end{aligned}$$

The following lemma gives the expectation of  $\Psi_i$ 's and  $\Phi_i$ 's with respect to  $\beta$  and  $\varepsilon$ .

**Lemma 1** (Expectation of  $\Psi_i$ 's and  $\Phi_i$ 's). Denote  $\mathbf{q}_U(\lambda, \boldsymbol{\psi}) = (\mu_\star^2 - \lambda\psi_1, \mu_1^2, \psi_2, 0, 0)$ . We have

$$\begin{aligned}\mathbb{E}_{\boldsymbol{\epsilon}, \beta}[\Psi_1] &= \mu_1^2 F_1^2 \cdot \frac{1}{d} \text{Tr}(\overline{\mathbf{M}}^{-1} \mathbf{Q}) \times (1 + o_d(1)), \\ \mathbb{E}_{\boldsymbol{\epsilon}, \beta}[\Psi_2] &= -\frac{2F_1^2}{\psi_2} \cdot \frac{1}{d} \text{Tr}(\mathbf{Z} \overline{\mathbf{M}}^{-1} \mathbf{Z}_1^\top) \times (1 + o_d(1)), \\ \mathbb{E}_{\boldsymbol{\epsilon}, \beta}[\Psi_3] &= \frac{F_1^2}{\psi_2^2} \cdot \frac{1}{d} \text{Tr}(\mathbf{Z} \overline{\mathbf{M}}^{-1} \mathbf{Z}^\top \mathbf{H}) + \frac{\tau^2}{\psi_2^2} \cdot \frac{1}{d} \text{Tr}(\mathbf{Z} \overline{\mathbf{M}}^{-1} \mathbf{Z}^\top), \\ \mathbb{E}_{\boldsymbol{\epsilon}, \beta}[\Phi_1] &= \mu_1^2 F_1^2 \cdot \frac{1}{d} \text{Tr}(\overline{\mathbf{M}}^{-2} \mathbf{Q}) \times (1 + o_d(1)), \\ \mathbb{E}_{\boldsymbol{\epsilon}, \beta}[\Phi_2] &= -\frac{2F_1^2}{\psi_2} \cdot \frac{1}{d} \text{Tr}(\mathbf{Z} \overline{\mathbf{M}}^{-2} \mathbf{Z}_1^\top) \times (1 + o_d(1)), \\ \mathbb{E}_{\boldsymbol{\epsilon}, \beta}[\Phi_3] &= \frac{F_1^2}{\psi_2^2} \cdot \frac{1}{d} \text{Tr}(\mathbf{Z} \overline{\mathbf{M}}^{-2} \mathbf{Z}^\top \mathbf{H}) + \frac{\tau^2}{\psi_2^2} \cdot \frac{1}{d} \text{Tr}(\mathbf{Z} \overline{\mathbf{M}}^{-2} \mathbf{Z}^\top).\end{aligned}$$

Here the definitions of  $\mathbf{Q}$ ,  $\mathbf{H}$ , and  $\mathbf{Z}_1$  are given by Eq. (19).

Furthermore, we have

$$\begin{aligned}\mathbb{E}_{\boldsymbol{\epsilon}, \beta}[\Psi_1] &= \mu_1^2 F_1^2 \cdot \partial_{s_2} G_d(0_+; \mathbf{q}_U(\lambda, \boldsymbol{\psi})) \times (1 + o_d(1)), \\ \mathbb{E}_{\boldsymbol{\epsilon}, \beta}[\Psi_2] &= F_1^2 \cdot \partial_p G_d(0_+; \mathbf{q}_U(\lambda, \boldsymbol{\psi})) \times (1 + o_d(1)), \\ \mathbb{E}_{\boldsymbol{\epsilon}, \beta}[\Psi_3] &= F_1^2 \cdot (\partial_{t_2} G_d(0_+; \mathbf{q}_U(\lambda, \boldsymbol{\psi})) - 1) + \tau^2 \cdot (\partial_{t_1} G_d(0_+; \mathbf{q}_U(\lambda, \boldsymbol{\psi})) - 1), \\ \mathbb{E}_{\boldsymbol{\epsilon}, \beta}[\Phi_1] &= -\mu_1^2 F_1^2 \cdot \partial_{s_1} \partial_{s_2} G_d(0_+; \mathbf{q}_U(\lambda, \boldsymbol{\psi})) \times (1 + o_d(1)), \\ \mathbb{E}_{\boldsymbol{\epsilon}, \beta}[\Phi_2] &= -F_1^2 \cdot \partial_{s_1} \partial_p G_d(0_+; \mathbf{q}_U(\lambda, \boldsymbol{\psi})) \times (1 + o_d(1)), \\ \mathbb{E}_{\boldsymbol{\epsilon}, \beta}[\Phi_3] &= -F_1^2 \cdot \partial_{s_1} \partial_{t_2} G_d(0_+; \mathbf{q}_U(\lambda, \boldsymbol{\psi})) - \tau^2 \cdot \partial_{s_1} \partial_{t_1} G_d(0_+; \mathbf{q}_U(\lambda, \boldsymbol{\psi})).\end{aligned}$$

The definition of  $G_d$  is as in Definition 1, and  $\nabla_{\mathbf{q}}^k G_d(0_+; \mathbf{q})$  for  $k \in \{1, 2\}$  stands for the  $k$ 'th derivatives (as a vector or a matrix) of  $G_d(iu; \mathbf{q})$  with respect to  $\mathbf{q}$  in the  $u \rightarrow 0_+$  limit (with its elements given by partial derivatives)

$$\nabla_{\mathbf{q}}^k G_d(0_+; \mathbf{q}) = \lim_{u \rightarrow 0_+} \nabla_{\mathbf{q}}^k G_d(iu; \mathbf{q}).$$

We next state the asymptotic characterization of the log-determinant which was proven in (Mei & Montanari, 2019).

**Proposition 3** (Proposition 8.4 in (Mei & Montanari, 2019)). Define

$$\begin{aligned}\Xi(\xi, z_1, z_2; \mathbf{q}; \boldsymbol{\psi}) &\equiv \log[(s_2 z_1 + 1)(t_2 z_2 + 1) - \mu_1^2(1 + p)^2 z_1 z_2] - \mu_\star^2 z_1 z_2 \\ &\quad + s_1 z_1 + t_1 z_2 - \psi_1 \log(z_1/\psi_1) - \psi_2 \log(z_2/\psi_2) - \xi(z_1 + z_2) - \psi_1 - \psi_2.\end{aligned}\tag{39}$$

For  $\xi \in \mathbb{C}_+$  and  $\mathbf{q} \in \mathcal{Q}$  (c.f. Eq. (25)), let  $m_1(\xi; \mathbf{q}; \boldsymbol{\psi})$ ,  $m_2(\xi; \mathbf{q}; \boldsymbol{\psi})$  be defined as the analytic continuation of solution of Eq. (26) as defined in Definition 3. Define

$$g(\xi; \mathbf{q}; \boldsymbol{\psi}) = \Xi(\xi, m_1(\xi; \mathbf{q}; \boldsymbol{\psi}), m_2(\xi; \mathbf{q}; \boldsymbol{\psi}); \mathbf{q}; \boldsymbol{\psi}).\tag{40}$$

Consider proportional asymptotics  $N/d \rightarrow \psi_1$ ,  $N/d \rightarrow \psi_2$ , as per Assumption 3. Then for any fixed  $\xi \in \mathbb{C}_+$  and  $\mathbf{q} \in \mathcal{Q}$ , we have

$$\lim_{d \rightarrow \infty} \mathbb{E}[|G_d(\xi; \mathbf{q}) - g(\xi; \mathbf{q}; \boldsymbol{\psi})|] = 0.\tag{41}$$

Moreover, for any fixed  $u \in \mathbb{R}_+$  and  $\mathbf{q} \in \mathcal{Q}$ , we have

$$\lim_{d \rightarrow \infty} \mathbb{E}[\|\partial_{\mathbf{q}} G_d(iu; \mathbf{q}) - \partial_{\mathbf{q}} g(iu; \mathbf{q}; \boldsymbol{\psi})\|_2] = 0,\tag{42}$$

$$\lim_{d \rightarrow \infty} \mathbb{E}[\|\nabla_{\mathbf{q}}^2 G_d(iu; \mathbf{q}) - \nabla_{\mathbf{q}}^2 g(iu; \mathbf{q}; \boldsymbol{\psi})\|_{\text{op}}] = 0.\tag{43}$$

**Remark 4.** Note that Proposition 8.4 in (Mei & Montanari, 2019) stated that the Eq. (42) and (43) holds at  $\mathbf{q} = \mathbf{0}$ . However, by a simple modification of their proof, one can show that these equations also holds at any  $\mathbf{q} \in \mathcal{Q}$ .

Combining Assumption 5 with Proposition 3, we have

**Proposition 4.** *Let Assumption 5 holds. For any  $\lambda \in \Lambda_U$ , denote  $\mathbf{q}_U = \mathbf{q}_U(\lambda, \boldsymbol{\psi}) = (\mu_\star^2 - \lambda\psi_1, \mu_1^2, \psi_2, 0, 0)$ , then we have, for  $k = 1, 2$ ,*

$$\|\nabla_{\mathbf{q}}^k G_d(0_+; \mathbf{q}_U) - \lim_{u \rightarrow 0_+} \nabla_{\mathbf{q}}^k g(iu; \mathbf{q}_U; \boldsymbol{\psi})\| = o_{d, \mathbb{P}}(1).$$

As a consequence of Proposition 4, we can calculate the asymptotics of  $\Psi_i$ 's and  $\Phi_i$ 's. Combined with the concentration result in Lemma 2 latter in the section, the proposition below completes the proof of the part of Proposition 2 regarding the standard uniform convergence  $U$ . Its correctness follows directly from Lemma 1 and Proposition 4.

**Proposition 5.** *Follow the assumptions of Proposition 2. For any  $\lambda \in \Lambda_U$ , denote  $\mathbf{q}_U(\lambda, \boldsymbol{\psi}) = (\mu_\star^2 - \lambda\psi_1, \mu_1^2, \psi_2, 0, 0)$ , then we have*

$$\begin{aligned} \mathbb{E}_{\boldsymbol{\epsilon}, \boldsymbol{\beta}}[\Psi_1] &\xrightarrow{\mathbb{P}} \mu_1^2 F_1^2 \cdot \partial_{s_2} g(0_+; \mathbf{q}_U(\lambda, \boldsymbol{\psi}); \boldsymbol{\psi}), \\ \mathbb{E}_{\boldsymbol{\epsilon}, \boldsymbol{\beta}}[\Psi_2] &\xrightarrow{\mathbb{P}} F_1^2 \cdot \partial_p g(0_+; \mathbf{q}_U(\lambda, \boldsymbol{\psi}); \boldsymbol{\psi}), \\ \mathbb{E}_{\boldsymbol{\epsilon}, \boldsymbol{\beta}}[\Psi_3] &\xrightarrow{\mathbb{P}} F_1^2 \cdot \left( \partial_{t_2} g(0_+; \mathbf{q}_U(\lambda, \boldsymbol{\psi}); \boldsymbol{\psi}) - 1 \right) + \tau^2 \left( \partial_{t_1} g(0_+; \mathbf{q}_U(\lambda, \boldsymbol{\psi}); \boldsymbol{\psi}) - 1 \right), \\ \mathbb{E}_{\boldsymbol{\epsilon}, \boldsymbol{\beta}}[\Phi_1] &\xrightarrow{\mathbb{P}} -\mu_1^2 F_1^2 \cdot \partial_{s_1} \partial_{s_2} g(0_+; \mathbf{q}_U(\lambda, \boldsymbol{\psi}); \boldsymbol{\psi}), \\ \mathbb{E}_{\boldsymbol{\epsilon}, \boldsymbol{\beta}}[\Phi_2] &\xrightarrow{\mathbb{P}} -F_1^2 \cdot \partial_{s_1} \partial_p g(0_+; \mathbf{q}_U(\lambda, \boldsymbol{\psi}); \boldsymbol{\psi}), \\ \mathbb{E}_{\boldsymbol{\epsilon}, \boldsymbol{\beta}}[\Phi_3] &\xrightarrow{\mathbb{P}} -F_1^2 \cdot \partial_{s_1} \partial_{t_2} g(0_+; \mathbf{q}_U(\lambda, \boldsymbol{\psi}); \boldsymbol{\psi}) - \tau^2 \cdot \partial_{s_1} \partial_{t_1} g(0_+; \mathbf{q}_U(\lambda, \boldsymbol{\psi}); \boldsymbol{\psi}), \end{aligned}$$

where  $\nabla_{\mathbf{q}}^k g(0_+; \mathbf{q}; \boldsymbol{\psi})$  for  $k \in \{1, 2\}$  stands for the  $k$ 'th derivatives (as a vector or a matrix) of  $g(iu; \mathbf{q}; \boldsymbol{\psi})$  with respect to  $\mathbf{q}$  in the  $u \rightarrow 0_+$  limit (with its elements given by partial derivatives)

$$\nabla_{\mathbf{q}}^k g(0_+; \mathbf{q}; \boldsymbol{\psi}) = \lim_{u \rightarrow 0_+} \nabla_{\mathbf{q}}^k g(iu; \mathbf{q}; \boldsymbol{\psi}).$$

As a consequence, we have

$$\mathbb{E}_{\boldsymbol{\epsilon}, \boldsymbol{\beta}}[\overline{U}_c(\lambda, N, n, d)] \xrightarrow{\mathbb{P}} \overline{U}(\lambda, \psi_1, \psi_2), \quad \mathbb{E}_{\boldsymbol{\epsilon}, \boldsymbol{\beta}}[\psi_1 \|\overline{\mathbf{a}}_{U, c}(\lambda)\|_2^2] \xrightarrow{\mathbb{P}} \mathcal{A}_U(\lambda, \psi_1, \psi_2),$$

where the definitions of  $\overline{U}$  and  $\mathcal{A}_U$  are given in Definition 5. Here  $\xrightarrow{\mathbb{P}}$  stands for convergence in probability as  $N/d \rightarrow \psi_1$  and  $n/d \rightarrow \psi_2$  (with respect to the randomness of  $\mathbf{X}$  and  $\boldsymbol{\Theta}$ ).

**Lemma 2.** *Follow the assumptions of Proposition 2. For any  $\lambda \in \Lambda_U$ , we have*

$$\begin{aligned} \text{Var}_{\boldsymbol{\epsilon}, \boldsymbol{\beta}}[\Psi_1], \text{Var}_{\boldsymbol{\epsilon}, \boldsymbol{\beta}}[\Psi_2], \text{Var}_{\boldsymbol{\epsilon}, \boldsymbol{\beta}}[\Psi_3] &= o_{d, \mathbb{P}}(1), \\ \text{Var}_{\boldsymbol{\epsilon}, \boldsymbol{\beta}}[\Phi_1], \text{Var}_{\boldsymbol{\epsilon}, \boldsymbol{\beta}}[\Phi_2], \text{Var}_{\boldsymbol{\epsilon}, \boldsymbol{\beta}}[\Phi_3] &= o_{d, \mathbb{P}}(1), \end{aligned}$$

so that

$$\text{Var}_{\boldsymbol{\epsilon}, \boldsymbol{\beta}}[\overline{U}_c(\lambda, N, n, d)], \text{Var}_{\boldsymbol{\epsilon}, \boldsymbol{\beta}}[\|\overline{\mathbf{a}}_{U, c}(\lambda)\|_2^2] = o_{d, \mathbb{P}}(1).$$

Here,  $o_{d, \mathbb{P}}(1)$  stands for converges to 0 in probability (with respect to the randomness of  $\mathbf{X}$  and  $\boldsymbol{\Theta}$ ) as  $N/d \rightarrow \psi_1$  and  $n/d \rightarrow \psi_2$  and  $d \rightarrow \infty$ .

Now, combining Lemma 2 and Proposition 5, we have

$$\overline{U}_c(\lambda, N, n, d) \xrightarrow{\mathbb{P}} \overline{U}(\lambda, \psi_1, \psi_2), \quad \psi_1 \|\overline{\mathbf{a}}_{U, c}(\lambda)\|_2^2 \xrightarrow{\mathbb{P}} \mathcal{A}_U(\lambda, \psi_1, \psi_2),$$

Finally, combining with the arguments in Appendix D.2 proves the asymptotics of  $\overline{U}$  and  $\psi_1 \|\overline{\mathbf{a}}_U(\lambda)\|_2^2$ .

#### D.4. The asymptotics of $\overline{T}_c$ and $\psi_1 \|\overline{\mathbf{a}}_{T, c}(\lambda)\|_2^2$

In the following, we derive the asymptotics of  $\overline{T}_c(\lambda, N, n, d)$  and  $\psi_1 \|\overline{\mathbf{a}}_{T, c}(\lambda)\|_2^2$ . This follows the same steps as the proof of the asymptotics of  $\overline{U}_c$  and  $\psi_1 \|\overline{\mathbf{a}}_{U, c}(\lambda)\|_2^2$ . We will give an overview of its proof. The detailed proof is the same as that of  $\overline{U}_c$ , and we will not include them for brevity.

For a fixed  $\lambda \in \Lambda_T$ , recalling that the definition of  $\bar{T}_c$  as in Eq. (36), we have

$$\begin{aligned}\bar{T}_c(\lambda, N, n, d) &= \sup_{\mathbf{a}} \inf_{\boldsymbol{\mu}} \left[ R_c(\mathbf{a}) - \lambda \psi_1 \|\mathbf{a}\|_2^2 + 2\langle \boldsymbol{\mu}, \mathbf{Z}\mathbf{a} - \mathbf{y}/\sqrt{d} \rangle \right] \\ &= \sup_{\mathbf{a}} \inf_{\boldsymbol{\mu}} \left( \langle \mathbf{a}, (\mathbf{U}_c - \lambda \psi_1 \mathbf{I}_N) \mathbf{a} \rangle - 2\langle \mathbf{a}, \mathbf{v} \rangle + 2\langle \boldsymbol{\mu}, \mathbf{Z}\mathbf{a} \rangle - 2\langle \boldsymbol{\mu}, \mathbf{y}/\sqrt{d} \rangle \right) + \mathbb{E}[y^2] \\ &= \sup_{\sqrt{d}\mathbf{Z}\mathbf{a}=\mathbf{y}} \langle \mathbf{a}, (\mathbf{U}_c - \lambda \psi_1 \mathbf{I}_N) \mathbf{a} \rangle - 2\langle \mathbf{a}, \mathbf{v} \rangle + \mathbb{E}[y^2]\end{aligned}\quad (44)$$

Whenever the good event in Assumption 4 happens,  $(\mathbf{U}_c - \lambda \psi_1 \mathbf{I}_N)$  is negative definite in  $\text{null}(\mathbf{Z})$ . The optimum of the above variational equation exists. By KKT condition, the optimal  $\mathbf{a}$  and dual variable  $\boldsymbol{\mu}$  satisfies

- Stationary condition:  $(\mathbf{U}_c - \lambda \psi_1 \mathbf{I}_N) \mathbf{a} + \mathbf{Z}^\top \boldsymbol{\mu} = \mathbf{v}$ .
- Primal Feasible:  $\mathbf{Z}\mathbf{a} = \mathbf{y}/\sqrt{d}$ .

The two conditions can be written compactly as

$$\begin{bmatrix} \mathbf{U}_c - \lambda \psi_1 \mathbf{I}_N & \mathbf{Z}^\top \\ \mathbf{Z} & \mathbf{0} \end{bmatrix} \begin{bmatrix} \mathbf{a} \\ \boldsymbol{\mu} \end{bmatrix} = \begin{bmatrix} \mathbf{v} \\ \mathbf{y}/\sqrt{d} \end{bmatrix}.\quad (45)$$

We define

$$\bar{\mathbf{M}} \equiv \begin{bmatrix} \mathbf{U}_c - \lambda \psi_1 \mathbf{I}_N & \mathbf{Z}^\top \\ \mathbf{Z} & \mathbf{0} \end{bmatrix}, \quad \bar{\mathbf{v}} \equiv \begin{bmatrix} \mathbf{v} \\ \mathbf{y}/\sqrt{d} \end{bmatrix}.\quad (46)$$

Under Assumption 4,  $\bar{\mathbf{M}}$  is invertible. To see this, suppose there exists vector  $[\mathbf{a}_1^\top, \boldsymbol{\mu}_1^\top]^\top \neq \mathbf{0} \in \mathbb{R}^{N+n}$  such that  $\bar{\mathbf{M}}[\mathbf{a}_1^\top, \boldsymbol{\mu}_1^\top]^\top = \mathbf{0}$ , then

$$\begin{aligned}(\mathbf{U}_c - \lambda \psi_1 \mathbf{I}_N) \mathbf{a}_1 + \mathbf{Z}^\top \boldsymbol{\mu}_1 &= \mathbf{0}, \\ \mathbf{Z} \mathbf{a}_1 &= \mathbf{0}.\end{aligned}$$

As in Assumption 4, let  $\mathbf{P}_{\text{null}} = \mathbf{I}_N - \mathbf{Z}^\dagger \mathbf{Z}$ . We write  $\mathbf{a}_1 = \mathbf{P}_{\text{null}} \mathbf{v}_1$  for some  $\mathbf{v}_1 \neq \mathbf{0} \in \mathbb{R}^N$ . Then,

$$\begin{aligned}(\mathbf{U}_c - \lambda \psi_1 \mathbf{I}_N) \mathbf{P}_{\text{null}} \mathbf{v}_1 + \mathbf{Z}^\top \boldsymbol{\mu}_1 &= \mathbf{0}, \\ \Rightarrow \mathbf{P}_{\text{null}} (\mathbf{U}_c - \lambda \psi_1 \mathbf{I}_N) \mathbf{P}_{\text{null}} \mathbf{v}_1 + \mathbf{P}_{\text{null}} \mathbf{Z}^\top \boldsymbol{\mu}_1 &= \mathbf{0}, \\ \Rightarrow \mathbf{P}_{\text{null}} (\mathbf{U}_c - \lambda \psi_1 \mathbf{I}_N) \mathbf{P}_{\text{null}} \mathbf{v}_1 &= \mathbf{0},\end{aligned}$$

where the last relation come from the fact that  $\mathbf{Z} \mathbf{P}_{\text{null}} = \mathbf{0}$ . However by Assumption 4,  $\mathbf{P}_{\text{null}} (\mathbf{U}_c - \lambda \psi_1 \mathbf{I}_N) \mathbf{P}_{\text{null}}$  is negative definite, which leads to a contradiction.

In the following, we assume the event in Assumption 4 happens so that  $\bar{\mathbf{M}}$  is invertible. In this case, the maximizer in Eq. (44) can be well defined as

$$\bar{\mathbf{a}}_{T,c}(\lambda) = [\mathbf{I}_N, \mathbf{0}_{N \times n}] \bar{\mathbf{M}}^{-1} \bar{\mathbf{v}}.$$

Moreover, we can write  $\bar{T}_c$  as

$$\bar{T}_c(\lambda, N, n, d) = \mathbb{E}[y^2] - \bar{\mathbf{v}}^\top \bar{\mathbf{M}}^{-1} \bar{\mathbf{v}}.$$

We further define

$$\bar{\mathbf{v}}_1 = [\mathbf{v}^\top, \mathbf{0}_{n \times 1}^\top]^\top, \quad \bar{\mathbf{v}}_2 = [\mathbf{0}_{N \times 1}^\top, \mathbf{y}^\top/\sqrt{d}]^\top, \quad \mathbf{E} \equiv \begin{bmatrix} \mathbf{I}_N & \mathbf{0}_{N \times n} \\ \mathbf{0}_{n \times N} & \mathbf{0}_{n \times n} \end{bmatrix}.$$

Simple calculation shows that

$$\begin{aligned}\bar{T}_c(\lambda, N, n, d) &\equiv \mathbb{E}[y^2] - \langle \bar{\mathbf{v}}, \bar{\mathbf{M}}^{-1} \bar{\mathbf{v}} \rangle = F_1^2 + \tau^2 - \Psi_1 - \Psi_2 - \Psi_3, \\ \|\bar{\mathbf{a}}_{U,c}\|_2^2 &\equiv \langle \bar{\mathbf{v}}, \bar{\mathbf{M}}^{-1} \mathbf{E} \bar{\mathbf{M}}^{-1} \bar{\mathbf{v}} \rangle = \Phi_1 + \Phi_2 + \Phi_3,\end{aligned}$$

where

$$\begin{aligned}\Psi_1 &= \langle \bar{\mathbf{v}}_1, \bar{\mathbf{M}}^{-1} \bar{\mathbf{v}}_1 \rangle, & \Phi_1 &= \langle \bar{\mathbf{v}}_1, \bar{\mathbf{M}}^{-1} \mathbf{E} \bar{\mathbf{M}}^{-1} \bar{\mathbf{v}}_1 \rangle, \\ \Psi_2 &= 2\langle \bar{\mathbf{v}}_2, \bar{\mathbf{M}}^{-1} \bar{\mathbf{v}}_1 \rangle, & \Phi_2 &= 2\langle \bar{\mathbf{v}}_2, \bar{\mathbf{M}}^{-1} \mathbf{E} \bar{\mathbf{M}}^{-1} \bar{\mathbf{v}}_1 \rangle, \\ \Psi_3 &= \langle \bar{\mathbf{v}}_2, \bar{\mathbf{M}}^{-1} \bar{\mathbf{v}}_2 \rangle, & \Phi_3 &= \langle \bar{\mathbf{v}}_2, \bar{\mathbf{M}}^{-1} \mathbf{E} \bar{\mathbf{M}}^{-1} \bar{\mathbf{v}}_2 \rangle.\end{aligned}$$

The following lemma gives the expectation of  $\Psi_i$ 's and  $\Phi_i$ 's with respect to  $\beta$  and  $\varepsilon$ .

**Lemma 3** (Expectation of  $\Psi_i$ 's and  $\Phi_i$ 's). Denote  $\mathbf{q}_T(\lambda, \psi) = (\mu_\star^2 - \lambda\psi_1, \mu_1^2, 0, 0, 0)$ . We have

$$\begin{aligned}\mathbb{E}_{\epsilon, \beta}[\Psi_1] &= \mu_1^2 F_1^2 \cdot \partial_{s_2} G_d(0_+; \mathbf{q}_T(\lambda, \psi)) \times (1 + o_d(1)), \\ \mathbb{E}_{\epsilon, \beta}[\Psi_2] &= F_1^2 \cdot \partial_p G_d(0_+; \mathbf{q}_T(\lambda, \psi)) \times (1 + o_d(1)), \\ \mathbb{E}_{\epsilon, \beta}[\Psi_3] &= F_1^2 \cdot \partial_{t_2} G_d(0_+; \mathbf{q}_T(\lambda, \psi)) + \tau^2 \cdot \partial_{t_1} G_d(0_+; \mathbf{q}_T(\lambda, \psi)), \\ \mathbb{E}_{\epsilon, \beta}[\Phi_1] &= -\mu_1^2 F_1^2 \cdot \partial_{s_1} \partial_{s_2} G_d(0_+; \mathbf{q}_T(\lambda, \psi)) \times (1 + o_d(1)), \\ \mathbb{E}_{\epsilon, \beta}[\Phi_2] &= -F_1^2 \cdot \partial_{s_1} \partial_p G_d(0_+; \mathbf{q}_T(\lambda, \psi)) \times (1 + o_d(1)), \\ \mathbb{E}_{\epsilon, \beta}[\Phi_3] &= -F_1^2 \cdot \partial_{s_1} \partial_{t_2} G_d(0_+; \mathbf{q}_T(\lambda, \psi)) - \tau^2 \cdot \partial_{s_1} \partial_{t_1} G_d(0_+; \mathbf{q}_T(\lambda, \psi)).\end{aligned}$$

The definition of  $G_d$  is as in Definition 1, and  $\nabla_{\mathbf{q}}^k G_d(0_+; \mathbf{q})$  for  $k \in \{1, 2\}$  stands for the  $k$ 'th derivatives (as a vector or a matrix) of  $G_d(\mathbf{i}u; \mathbf{q})$  with respect to  $\mathbf{q}$  in the  $u \rightarrow 0_+$  limit (with its elements given by partial derivatives)

$$\nabla_{\mathbf{q}}^k G_d(0_+; \mathbf{q}) = \lim_{u \rightarrow 0_+} \nabla_{\mathbf{q}}^k G_d(\mathbf{i}u; \mathbf{q}).$$

The proof of Lemma 3 follows from direct calculation and is identical to the proof of Lemma 1. Combining Assumption 5 with Proposition 3, we have

**Proposition 6.** Let Assumption 5 holds. For any  $\lambda \in \Lambda_T$ , denote  $\mathbf{q}_T = \mathbf{q}_T(\lambda, \psi) = (\mu_\star^2 - \lambda\psi_1, \mu_1^2, 0, 0, 0)$ , then we have, for  $k = 1, 2$ ,

$$\|\nabla_{\mathbf{q}}^k G_d(0_+; \mathbf{q}_T) - \lim_{u \rightarrow 0_+} \nabla_{\mathbf{q}}^k g(\mathbf{i}u; \mathbf{q}_T; \psi)\| = o_{d, \mathbb{P}}(1).$$

As a consequence of Proposition 6, we can calculate the asymptotics of  $\Psi_i$ 's and  $\Phi_i$ 's.

**Proposition 7.** Follow the assumptions of Proposition 2. For any  $\lambda \in \Lambda_T$ , denote  $\mathbf{q}_T(\lambda, \psi) = (\mu_\star^2 - \lambda\psi_1, \mu_1^2, 0, 0, 0)$ , then we have

$$\begin{aligned}\mathbb{E}_{\epsilon, \beta}[\Psi_1] &\xrightarrow{\mathbb{P}} \mu_1^2 F_1^2 \cdot \partial_{s_2} g(0_+; \mathbf{q}_T(\lambda, \psi); \psi), \\ \mathbb{E}_{\epsilon, \beta}[\Psi_2] &\xrightarrow{\mathbb{P}} F_1^2 \cdot \partial_p g(0_+; \mathbf{q}_T(\lambda, \psi); \psi), \\ \mathbb{E}_{\epsilon, \beta}[\Psi_3] &\xrightarrow{\mathbb{P}} F_1^2 \cdot \partial_{t_2} g(0_+; \mathbf{q}_T(\lambda, \psi); \psi) + \tau^2 \cdot \partial_{t_1} g(0_+; \mathbf{q}_T(\lambda, \psi); \psi), \\ \mathbb{E}_{\epsilon, \beta}[\Phi_1] &\xrightarrow{\mathbb{P}} -\mu_1^2 F_1^2 \cdot \partial_{s_1} \partial_{s_2} g(0_+; \mathbf{q}_T(\lambda, \psi); \psi), \\ \mathbb{E}_{\epsilon, \beta}[\Phi_2] &\xrightarrow{\mathbb{P}} -F_1^2 \cdot \partial_{s_1} \partial_p g(0_+; \mathbf{q}_T(\lambda, \psi); \psi), \\ \mathbb{E}_{\epsilon, \beta}[\Phi_3] &\xrightarrow{\mathbb{P}} -F_1^2 \cdot \partial_{s_1} \partial_{t_2} g(0_+; \mathbf{q}_T(\lambda, \psi); \psi) - \tau^2 \cdot \partial_{s_1} \partial_{t_1} g(0_+; \mathbf{q}_T(\lambda, \psi); \psi),\end{aligned}$$

where  $\nabla_{\mathbf{q}}^k g(0_+; \mathbf{q}; \psi)$  for  $k \in \{1, 2\}$  stands for the  $k$ 'th derivatives (as a vector or a matrix) of  $g(\mathbf{i}u; \mathbf{q}; \psi)$  with respect to  $\mathbf{q}$  in the  $u \rightarrow 0_+$  limit (with its elements given by partial derivatives)

$$\nabla_{\mathbf{q}}^k g(0_+; \mathbf{q}; \psi) = \lim_{u \rightarrow 0_+} \nabla_{\mathbf{q}}^k g(\mathbf{i}u; \mathbf{q}; \psi).$$

As a consequence, we have

$$\mathbb{E}_{\epsilon, \beta}[\overline{T}_c(\lambda, N, n, d)] \xrightarrow{\mathbb{P}} \overline{T}(\lambda, \psi_1, \psi_2), \quad \mathbb{E}_{\epsilon, \beta}[\psi_1 \|\overline{\mathbf{a}}_{T, c}(\lambda)\|_2^2] \xrightarrow{\mathbb{P}} \mathcal{A}_T(\lambda, \psi_1, \psi_2),$$

where the definitions of  $\overline{T}$  and  $\mathcal{A}_T$  are given in Definition 5. Here  $\xrightarrow{\mathbb{P}}$  stands for convergence in probability as  $N/d \rightarrow \psi_1$  and  $n/d \rightarrow \psi_2$  (with respect to the randomness of  $\mathbf{X}$  and  $\Theta$ ).

The Proposition above suggests that  $\Psi_i$  and  $\Phi_i$  concentrates with respect to the randomness in  $\mathbf{X}$  and  $\Theta$ . To complete the concentration proof, we need to show that  $\Psi_i$  and  $\Phi_i$  concentrates with respect to the randomness in  $\beta$  and  $\epsilon$ .

**Lemma 4.** Follow the assumptions of Proposition 2. For any  $\lambda \in \Lambda_T$ , we have

$$\begin{aligned}\text{Var}_{\epsilon, \beta}[\Psi_1], \text{Var}_{\epsilon, \beta}[\Psi_2], \text{Var}_{\epsilon, \beta}[\Psi_3] &= o_{d, \mathbb{P}}(1), \\ \text{Var}_{\epsilon, \beta}[\Phi_1], \text{Var}_{\epsilon, \beta}[\Phi_2], \text{Var}_{\epsilon, \beta}[\Phi_3] &= o_{d, \mathbb{P}}(1),\end{aligned}$$

so that

$$\text{Var}_{\epsilon, \beta}[\bar{T}_c(\lambda, N, n, d)], \text{Var}_{\epsilon, \beta}[\|\bar{\mathbf{a}}_{T,c}(\lambda)\|_2^2] = o_d(\mathbb{P}(1)).$$

Here,  $o_d(\mathbb{P}(1))$  stands for converges to 0 in probability (with respect to the randomness of  $\mathbf{X}$  and  $\Theta$ ) as  $N/d \rightarrow \psi_1$  and  $n/d \rightarrow \psi_2$  and  $d \rightarrow \infty$ .

Now, combining Proposition 7 and 4, we have

$$\bar{T}_c(\lambda, N, n, d) \xrightarrow{\mathbb{P}} \bar{\mathcal{T}}(\lambda, \psi_1, \psi_2), \quad \psi_1 \|\bar{\mathbf{a}}_{T,c}(\lambda)\|_2^2 \xrightarrow{\mathbb{P}} \mathcal{A}_T(\lambda, \psi_1, \psi_2).$$

The results above combined with the arguments in Appendix D.2 completes the proof for the asymptotics of  $\bar{T}$  and  $\psi_1 \|\bar{\mathbf{a}}_T(\lambda)\|_2^2$ .

### D.5. Proof of Lemma 1 and Lemma 2

*Proof of Lemma 1.* Note that by Assumption 4, the matrix  $\bar{\mathbf{M}} = \mathbf{U}_c - \psi_2^{-1} \mathbf{Z}^\top \mathbf{Z} - \psi_1 \lambda \mathbf{I}_N$  is negative definite (so that it is invertible) with high probability. Moreover, whenever  $\bar{\mathbf{M}}$  is negative definite, the matrix  $\mathbf{A}(\mathbf{q}_U)$  for  $\mathbf{q}_U = (\mu_\star^2 - \lambda\psi_1, \mu_1^2, \psi_2, 0, 0)$  is also invertible. In the following, we condition on this good event happens.

From the expansion for  $\mathbf{v}_i$  in (34), we have

$$\mathbb{E}_{\beta, \epsilon} \Psi_1 = \mathbb{E}_{\beta, \epsilon} \left[ \text{Tr}(\bar{\mathbf{M}}^{-1} \mathbf{v} \mathbf{v}^\top) \right] = \frac{1}{d} \lambda_{d,1}(\sigma)^2 F_1^2 \cdot \left[ \text{Tr}(\bar{\mathbf{M}}^{-1} \Theta \Theta^\top) \right] = \frac{1}{d} \mu_1^2 F_1^2 \text{Tr} \left( \bar{\mathbf{M}}^{-1} \frac{\Theta \Theta^\top}{d} \right) \times (1 + o_d(1)),$$

where we used the relation  $\lambda_{d,1} = \mu_1 / \sqrt{d} \times (1 + o_d(1))$  as in Eq. (66). Similarly, the second term is

$$\begin{aligned} \mathbb{E}_{\beta, \epsilon} \Psi_2 &= - \frac{2}{\psi_2 \sqrt{d}} \mathbb{E}_{\beta, \epsilon} \left[ \text{Tr}(\mathbf{Z} \bar{\mathbf{M}}^{-1} \mathbf{v} \mathbf{y}^\top) \right] \\ &= - \frac{2}{\psi_2 d \sqrt{d}} \lambda_{d,1}(\sigma) F_1^2 \cdot \text{Tr}(\mathbf{Z} \bar{\mathbf{M}}^{-1} \Theta \mathbf{X}^\top) \\ &= - \frac{2}{\psi_2 d^2} \mu_1 F_1^2 \cdot \text{Tr}(\mathbf{Z} \bar{\mathbf{M}}^{-1} \Theta \mathbf{X}^\top) \times (1 + o_d(1)). \end{aligned}$$

To compute  $\Psi_3$ , note we have

$$\mathbb{E}_{\beta, \epsilon} [\mathbf{y} \mathbf{y}^\top] = F_1^2 \cdot (\mathbf{X} \mathbf{X}^\top) / d + \tau^2 \mathbf{I}_n.$$

This gives the expansion for  $\Psi_3$

$$\begin{aligned} \mathbb{E}_{\beta, \epsilon} \Psi_3 &= \psi_2^{-2} d^{-1} \mathbb{E}_{\beta, \epsilon} \text{Tr}(\mathbf{Z} \bar{\mathbf{M}}^{-1} \mathbf{Z}^\top \mathbf{y} \mathbf{y}^\top) \\ &= \psi_2^{-2} d^{-2} F_1^2 \text{Tr}(\mathbf{Z} \bar{\mathbf{M}}^{-1} \mathbf{Z}^\top \mathbf{X} \mathbf{X}^\top) + \psi_2^{-2} d^{-1} \text{Tr}(\mathbf{Z} \bar{\mathbf{M}}^{-1} \mathbf{Z}) \tau^2. \end{aligned}$$

Through the same algebraic manipulation above, we have

$$\begin{aligned} \mathbb{E}_{\beta, \epsilon} \Phi_1 &= \frac{1}{d} \mu_1^2 F_1^2 \text{Tr} \left( \bar{\mathbf{M}}^{-2} \frac{\Theta \Theta^\top}{d} \right) \times (1 + o_d(1)), \\ \mathbb{E}_{\beta, \epsilon} \Phi_2 &= - \frac{2}{\psi_2 d^2} \mu_1 F_1^2 \cdot \text{Tr}(\mathbf{Z} \bar{\mathbf{M}}^{-2} \Theta \mathbf{X}^\top) \times (1 + o_d(1)), \\ \mathbb{E}_{\beta, \epsilon} \Phi_3 &= \psi_2^{-2} d^{-2} F_1^2 \cdot \text{Tr}(\mathbf{Z} \bar{\mathbf{M}}^{-2} \mathbf{Z}^\top \mathbf{X} \mathbf{X}^\top) + \psi_2^{-2} d^{-1} \tau^2 \text{Tr}(\mathbf{Z} \bar{\mathbf{M}}^{-2} \mathbf{Z}^\top). \end{aligned}$$

Next, we express the trace of matrices products as the derivative of the function  $G_d(\xi, \mathbf{q})$  (c.f. Definition 1). The derivatives of  $G_d$  are (which can we well-defined at  $\mathbf{q} = \mathbf{q}_U = (\mu_\star^2 - \lambda\psi_1, \mu_1^2, \psi_2, 0, 0)$  with high probability by Assumption 4)

$$\partial_{q_i} G_d(0, \mathbf{q}) = \frac{1}{d} \text{Tr}(\mathbf{A}(\mathbf{q})^{-1} \partial_i \mathbf{A}(\mathbf{q})), \quad \partial_{q_i} \partial_{q_j} G_d(0, \mathbf{q}) = -\frac{1}{d} \text{Tr}(\mathbf{A}(\mathbf{q})^{-1} \partial_{q_i} \mathbf{A}(\mathbf{q}) \mathbf{A}(\mathbf{q})^{-1} \partial_{q_j} \mathbf{A}(\mathbf{q})). \quad (47)$$

As an example, we consider evaluating  $\partial_{s_2} G_d(0, \mathbf{q})$  at  $\mathbf{q} = \mathbf{q}_U \equiv (\mu_\star^2 - \lambda\psi_1, \mu_1^2, \psi_2, 0, 0)$ . Using the formula for block matrix inversion, we have

$$\mathbf{A}(\mu_\star^2 - \lambda\psi_1, \mu_1^2, \psi_2, 0, 0)^{-1} = \begin{bmatrix} (\mu_\star^2 - \lambda\psi_1)\mathbf{I}_N + \mu_1^2\mathbf{Q} & \mathbf{Z}^\top \\ \mathbf{Z} & \psi_2\mathbf{I}_n \end{bmatrix}^{-1} = \begin{bmatrix} (\mathbf{U}_c - \psi_2^{-1}\mathbf{Z}^\top\mathbf{Z} - \psi_1\lambda\mathbf{I}_N)^{-1} & \cdots \\ \cdots & \cdots \end{bmatrix}.$$

Then we have

$$\partial_{s_2} G_d(0, \mathbf{q}_U) = \frac{1}{d} \text{Tr} \left( \begin{bmatrix} \overline{\mathbf{M}}^{-1} & \cdots \\ \cdots & \cdots \end{bmatrix} \begin{bmatrix} \mathbf{Q} & \mathbf{0} \\ \mathbf{0} & \mathbf{0} \end{bmatrix} \right) = \text{Tr}(\overline{\mathbf{M}}^{-1}\mathbf{Q})/d.$$

Applying similar argument to compute other derivatives, we get

1.  $\text{Tr}(\overline{\mathbf{M}}^{-1}\boldsymbol{\Theta}\boldsymbol{\Theta}^\top)/d^2 = \text{Tr}(\overline{\mathbf{M}}^{-1}\mathbf{Q})/d = \partial_{s_2} G_d(0, \mathbf{q}_U)$ .
2.  $\mu_1 \cdot \text{Tr}(\mathbf{Z}\overline{\mathbf{M}}^{-1}\boldsymbol{\Theta}\mathbf{X}^\top)/d^2 = \text{Tr}(\overline{\mathbf{M}}^{-1}\mathbf{Z}_1^\top\mathbf{Z})/d = -\psi_2\partial_p G_d(0, \mathbf{q}_U)/2$ .
3.  $\text{Tr}(\mathbf{Z}\overline{\mathbf{M}}^{-1}\mathbf{Z}^\top\mathbf{X}\mathbf{X}^\top)/d^2 = \text{Tr}(\mathbf{Z}\overline{\mathbf{M}}^{-1}\mathbf{Z}^\top\mathbf{H})/d = \psi_2^2\partial_{t_2} G_d(0, \mathbf{q}_U) - \psi_2^2$ .
4.  $\text{Tr}(\mathbf{Z}\overline{\mathbf{M}}^{-1}\mathbf{Z}^\top)/d = \psi_2^2\partial_{t_1} G_d(0, \mathbf{q}_U) - \psi_2^2$ .
5.  $\text{Tr}(\overline{\mathbf{M}}^{-2}\mathbf{Q})/d = -\partial_{s_1}\partial_{s_2} G_d(0, \mathbf{q}_U)$ .
6.  $(2/d\psi_2) \cdot \text{Tr}(\mathbf{Z}_1^\top\mathbf{Z}\overline{\mathbf{M}}^{-2}) = \partial_{s_1}\partial_p G_d(0, \mathbf{q}_U)$ .
7.  $\text{Tr}(\overline{\mathbf{M}}^{-2}\mathbf{Z}^\top\mathbf{H}\mathbf{Z})/(d\psi_2^2) = -\partial_{s_1}\partial_{t_2} G_d(0, \mathbf{q}_U)$ .
8.  $\text{Tr}(\overline{\mathbf{M}}^{-2}\mathbf{Z}^\top\mathbf{Z})/(d\psi_2^2) = -\partial_{s_1}\partial_{t_1} G_d(0, \mathbf{q}_U)$ .

Combining these equations concludes the proof.  $\square$

*Proof of Lemma 2.* We prove this lemma by assuming that  $\boldsymbol{\beta}$  follows a different distribution:  $\boldsymbol{\beta} \sim \mathcal{N}(\mathbf{0}, (\|\mathbf{F}_1\|_2^2/d)\mathbf{I}_d)$ . The case when  $\boldsymbol{\beta} \sim \text{Unif}(\mathbb{S}^{d-1}(F_1))$  can be treated similarly.

By directly calculating the variance, we can show that, there exists scalars  $(c_{ik}^{(d)})_{k \in [K_i]}$  with  $c_{ik}^{(d)} = \Theta_d(1)$ , and matrices  $(\mathbf{A}_{ik}, \mathbf{B}_{ik})_{k \in [K_i]} \subseteq \{\mathbf{I}_N, \mathbf{Q}, \mathbf{Z}^\top\mathbf{H}\mathbf{Z}, \mathbf{Z}^\top\mathbf{Z}\}$ , such that the variance of  $\Psi_i$ 's can be expressed in form

$$\text{Var}_{\boldsymbol{\varepsilon}, \boldsymbol{\beta}}(\Psi_i) = \frac{1}{d} \sum_{k=1}^{K_i} c_{ik}^{(d)} \text{Tr}(\overline{\mathbf{M}}^{-1}\mathbf{A}_{ik}\overline{\mathbf{M}}^{-1}\mathbf{B}_{ik})/d.$$

For example, by Lemma 8, we have

$$\begin{aligned} \text{Var}_{\boldsymbol{\beta} \sim \mathcal{N}(\mathbf{0}, (F_1^2/d)\mathbf{I}_d)}(\Psi_1) &= \lambda_{d,1}(\sigma)^4 \text{Var}_{\boldsymbol{\beta} \sim \mathcal{N}(\mathbf{0}, (F_1^2/d)\mathbf{I}_d)}(\boldsymbol{\beta}^\top \boldsymbol{\Theta}^\top \overline{\mathbf{M}}^{-1} \boldsymbol{\Theta} \boldsymbol{\beta}) = 2\lambda_{d,1}(\sigma)^4 F_1^4 \|\boldsymbol{\Theta}^\top \overline{\mathbf{M}}^{-1} \boldsymbol{\Theta}\|_F^2 / d^2 \\ &= c_1^{(d)} \text{Tr}(\overline{\mathbf{M}}^{-1}\mathbf{Q}\overline{\mathbf{M}}^{-1}\mathbf{Q})/d^2, \end{aligned}$$

where  $c_1^{(d)} = 2d^2\lambda_{d,1}(\sigma)^4 F_1^4 = O_d(1)$ . The variance of  $\Psi_2$  and  $\Psi_3$  can be calculated similarly.

Note that each  $\text{Tr}(\overline{\mathbf{M}}^{-1}\mathbf{A}_{ik}\overline{\mathbf{M}}^{-1}\mathbf{B}_{ik})/d$  can be expressed as an entry of  $\nabla_q^2 G_d(0; \mathbf{q})$  (c.f. Eq. (47)), and by Proposition 4, they are of order  $O_{d, \mathbb{P}}(1)$ . This gives

$$\text{Var}_{\boldsymbol{\varepsilon}, \boldsymbol{\beta}}(\Psi_i) = o_{d, \mathbb{P}}(1).$$

Similarly, for the same set of scalars  $(c_{ik}^{(d)})_{k \in [K_i]}$  and matrices  $(\mathbf{A}_{ik}, \mathbf{B}_{ik})_{k \in [K_i]}$ , we have

$$\text{Var}_{\boldsymbol{\varepsilon}, \boldsymbol{\beta}}(\Phi_i) = \frac{1}{d} \sum_{k=1}^{K_i} c_{ik} \text{Tr}(\overline{\mathbf{M}}^{-2}\mathbf{A}_{ik}\overline{\mathbf{M}}^{-2}\mathbf{B}_{ik})/d.$$

Note that for two semidefinite matrices  $\mathbf{A}, \mathbf{B}$ , we have  $\text{Tr}(\mathbf{A}\mathbf{B}) \leq \|\mathbf{A}\|_{\text{op}} \text{Tr}(\mathbf{B})$ . Moreover, note we have  $\|\overline{\mathbf{M}}\|_{\text{op}} = O_{d, \mathbb{P}}(1)$  (by Assumption 4). This gives

$$\text{Var}_{\boldsymbol{\varepsilon}, \boldsymbol{\beta}}(\Phi_i) = o_{d, \mathbb{P}}(1).$$

This concludes the proof.  $\square$

## D.6. Auxiliary Lemmas

The following lemma (Lemma 5) is a reformulation of Proposition 3 in (Ghorbani et al., 2019). We present it in a stronger form, but it can be easily derived from the proof of Proposition 3 in (Ghorbani et al., 2019). This lemma was first proved in (El Karoui, 2010) in the Gaussian case. (Notice that the second estimate —on  $Q_k(\Theta \mathbf{X}^\top)$ — follows by applying the first one whereby  $\Theta$  is replaced by  $\mathbf{W} = [\Theta^\top | \mathbf{X}^\top]^\top$ )

**Lemma 5.** *Let  $\Theta = (\theta_1, \dots, \theta_N)^\top \in \mathbb{R}^{N \times d}$  with  $(\theta_a)_{a \in [N]} \sim_{iid} \text{Unif}(\mathbb{S}^{d-1}(\sqrt{d}))$  and  $\mathbf{X} = (\mathbf{x}_1, \dots, \mathbf{x}_n)^\top \in \mathbb{R}^{n \times d}$  with  $(\mathbf{x}_i)_{i \in [n]} \sim_{iid} \text{Unif}(\mathbb{S}^{d-1}(\sqrt{d}))$ . Assume  $1/c \leq n/d, N/d \leq c$  for some constant  $c \in (0, \infty)$ . Then*

$$\mathbb{E} \left[ \sup_{k \geq 2} \|Q_k(\Theta \Theta^\top) - \mathbf{I}_N\|_{\text{op}}^2 \right] = o_d(1), \quad (48)$$

$$\mathbb{E} \left[ \sup_{k \geq 2} \|Q_k(\Theta \mathbf{X}^\top)\|_{\text{op}}^2 \right] = o_d(1). \quad (49)$$

Notice that the second estimate —on  $Q_k(\Theta \mathbf{X}^\top)$ — follows by applying the first one —Eq. (48)— whereby  $\Theta$  is replaced by  $\mathbf{W} = [\Theta^\top | \mathbf{X}^\top]^\top$ , and we use  $\|Q_k(\Theta \mathbf{X}^\top)\|_{\text{op}} \leq \|Q_k(\mathbf{W} \mathbf{W}^\top) - \mathbf{I}_{N+n}\|_{\text{op}}$ .

The following lemma (Lemma 6) can be easily derived from Lemma 5. Again, this lemma was first proved in (El Karoui, 2010) in the Gaussian case.

**Lemma 6.** *Let  $\Theta = (\theta_1, \dots, \theta_N)^\top \in \mathbb{R}^{N \times d}$  with  $(\theta_a)_{a \in [N]} \sim_{iid} \text{Unif}(\mathbb{S}^{d-1}(\sqrt{d}))$ . Let activation function  $\sigma$  satisfies Assumption 2. Assume  $1/c \leq N/d \leq c$  for some constant  $c \in (0, \infty)$ . Denote*

$$\mathbf{U} = \left( \mathbb{E}_{\mathbf{x} \sim \text{Unif}(\mathbb{S}^{d-1}(\sqrt{d}))} [\sigma(\langle \theta_a, \mathbf{x} \rangle / \sqrt{d}) \sigma(\langle \theta_b, \mathbf{x} \rangle / \sqrt{d})] \right)_{a,b \in [N]} \in \mathbb{R}^{N \times N}.$$

Then we can rewrite the matrix  $\mathbf{U}$  to be

$$\mathbf{U} = \lambda_{d,0}(\sigma)^2 \mathbf{1}_N \mathbf{1}_N^\top + \mu_1^2 \mathbf{Q} + \mu_\star^2 (\mathbf{I}_N + \mathbf{\Delta}),$$

with  $\mathbf{Q} = \Theta \Theta^\top / d$  and  $\mathbb{E}[\|\mathbf{\Delta}\|_{\text{op}}^2] = o_d(1)$ .

In the following, we show that, under sufficient regularity condition of  $\sigma$ , we have  $\lambda_{d,0}(\sigma) = O(1/d)$ .

**Lemma 7.** *Let  $\sigma \in C^2(\mathbb{R})$  with  $|\sigma'(x)|, |\sigma''(x)| < c_0 e^{c_1|x|}$  for some  $c_0, c_1 \in \mathbb{R}$ . Assume that  $\mathbb{E}_{G \sim \mathcal{N}(0,1)}[\sigma(G)] = 0$ . Then we have*

$$\lambda_{d,0}(\sigma) \equiv \mathbb{E}_{\mathbf{x} \sim \text{Unif}(\mathbb{S}^{d-1}(\sqrt{d}))} [\sigma(x_1)] = O(1/d).$$

*Proof of Lemma 7.* Let  $\mathbf{x} \sim \text{Unif}(\mathbb{S}^{d-1}(\sqrt{d}))$  and  $\gamma \sim \chi(d)/\sqrt{d}$  independently. Then we have  $\gamma \mathbf{x} \sim \mathcal{N}(\mathbf{0}, \mathbf{I}_d)$ , so that by the assumption, we have  $\mathbb{E}[\sigma(\gamma x_1)] = 0$ .

As a consequence, by the second order Taylor expansion, and by the independence of  $\gamma$  and  $\mathbf{x}$ , we have (for  $\xi(x_1) \in [\gamma, 1]$ )

$$\begin{aligned} |\lambda_{d,0}(\sigma)| &= |\mathbb{E}[\sigma(x_1)]| \leq |\mathbb{E}[\sigma(x_1)] - \mathbb{E}[\sigma(\gamma x_1)]| \leq \left| \mathbb{E}[\sigma'(x_1)x_1] \mathbb{E}[\gamma - 1] \right| + \left| (1/2) \mathbb{E}[\sigma''(\xi(x_1)x_1)(\gamma - 1)^2] \right| \\ &\leq \left| \mathbb{E}[\sigma'(x_1)x_1] \right| \cdot \left| \mathbb{E}[\gamma - 1] \right| + (1/2) \mathbb{E} \left[ \sup_{u \in [\gamma, 1]} \sigma''(ux_1)^2 \right]^{1/2} \mathbb{E}[(\gamma - 1)^4]^{1/2}. \end{aligned}$$

By the assumption that  $|\sigma'(x)|, |\sigma''(x)| < c_0 e^{c_1|x|}$  for some  $c_0, c_1 \in \mathbb{R}$ , there exists constant  $K$  that only depends on  $c_0$  and  $c_1$  such that

$$\sup_d \left| \mathbb{E}[\sigma'(x_1)x_1] \right| \leq K, \quad \sup_d \left| (1/2) \mathbb{E} \left[ \sup_{u \in [\gamma, 1]} \sigma''(ux_1)^2 \right]^{1/2} \right| \leq K.$$

Moreover, by property of the  $\chi$  distribution, we have

$$|\mathbb{E}[\gamma - 1]| = O(d^{-1}), \quad \mathbb{E}[(\gamma - 1)^4]^{1/2} = O(d^{-1}).$$

This concludes the proof.  $\square$

The following lemma is a simple variance calculation and can be found as Lemma C.5 in (Mei & Montanari, 2019). We restate here for completeness.

**Lemma 8.** *Let  $\mathbf{A} \in \mathbb{R}^{n \times N}$  and  $\mathbf{B} \in \mathbb{R}^{n \times n}$ . Let  $\mathbf{g} = (g_1, \dots, g_n)^\top$  with  $g_i \sim_{iid} \mathbb{P}_g$ ,  $\mathbb{E}_g[g] = 0$ , and  $\mathbb{E}_g[g^2] = 1$ . Let  $\mathbf{h} = (h_1, \dots, h_n)^\top$  with  $h_i \sim_{iid} \mathbb{P}_h$ ,  $\mathbb{E}_h[h] = 0$ , and  $\mathbb{E}_h[h^2] = 1$ . Further we assume that  $\mathbf{h}$  is independent of  $\mathbf{g}$ . Then we have*

$$\begin{aligned} \text{Var}(\mathbf{g}^\top \mathbf{A} \mathbf{h}) &= \|\mathbf{A}\|_F^2, \\ \text{Var}(\mathbf{g}^\top \mathbf{B} \mathbf{g}) &= \sum_{i=1}^n B_{ii}^2 (\mathbb{E}[g^4] - 3) + \|\mathbf{B}\|_F^2 + \text{Tr}(\mathbf{B}^2). \end{aligned}$$

## E. Proof of Theorem 1

Here we give the whole proof for  $U$ . The proof for  $T$  is the same.

For fixed  $A^2 \in \Gamma_U \equiv \{\mathcal{A}_U(\lambda, \psi_1, \psi_2) : \lambda \in \Lambda_U\}$ , we denote

$$\lambda_\star(A^2) = \inf_{\lambda} \left\{ \lambda : \mathcal{A}_U(\lambda, \psi_1, \psi_2) = A^2 \right\}.$$

By the definition of  $\Gamma_U$ , the set  $\{\lambda : \mathcal{A}_U(\lambda, \psi_1, \psi_2) = A^2\}$  is non-empty and lower bounded, so that  $\lambda_\star(A^2)$  can be well-defined. Moreover, we have  $\lambda_\star(A^2) \in \Lambda_U$ . It is also easy to see that we have

$$\lambda_\star(A^2) \in \arg \min_{\lambda \geq 0} \left[ \overline{\mathcal{U}}(\lambda, \psi_1, \psi_2) + \lambda A^2 \right]. \quad (50)$$

### E.1. Upper bound

Note we have

$$\begin{aligned} U(A, N, n, d) &= \sup_{(N/d)\|\mathbf{a}\|_2^2 \leq A^2} \left( R(\mathbf{a}) - \widehat{R}_n(\mathbf{a}) \right) \\ &\leq \inf_{\lambda} \sup_{(N/d)\|\mathbf{a}\|_2^2 \leq A^2} \left( R(\mathbf{a}) - \widehat{R}_n(\mathbf{a}) - \psi_1 \lambda (\|\mathbf{a}\|_2^2 - \psi_1^{-1} A^2) \right) \\ &\leq \inf_{\lambda} \left[ \overline{\mathcal{U}}(\lambda, N, n, d) + \lambda A^2 \right] \\ &\leq \overline{\mathcal{U}}(\lambda_\star(A^2), N, n, d) + \lambda_\star(A^2) A^2. \end{aligned}$$

Note that  $\lambda_\star(A^2) \in \Lambda_U$ , so by Lemma 5, in the limit of Assumption 3, we have

$$U(A, N, n, d) \leq \overline{\mathcal{U}}(\lambda_\star(A^2), \psi_1, \psi_2) + \lambda_\star(A^2) A^2 + o_{d, \mathbb{P}}(1) = \mathcal{U}(A, \psi_1, \psi_2) + o_{d, \mathbb{P}}(1),$$

where the last equality is by Eq. (50). This proves the upper bound.

### E.2. Lower bound

For any  $A^2 > 0$ , we define a random variable  $\hat{\lambda}(A^2)$  (which depend on  $\mathbf{X}, \boldsymbol{\Theta}, \boldsymbol{\beta}, \varepsilon$ ) by

$$\hat{\lambda}(A^2) = \inf \left\{ \lambda : \lambda \in \arg \min_{\lambda \geq 0} \left[ \overline{\mathcal{U}}(\lambda, N, n, d) + \lambda A^2 \right] \right\}.$$

By Proposition 1, the set is should always be non-empty, so that  $\hat{\lambda}(A^2)$  can always be well-defined.

Moreover, since  $\lambda_\star(A^2) \in \Lambda_U$ , by Assumption 4, as we have shown in the proof in Proposition 2, we can uniquely define  $\overline{\mathbf{a}}_U(\lambda_\star(A^2))$  with high probability, where

$$\overline{\mathbf{a}}_U(\lambda_\star(A^2)) = \arg \max_{\mathbf{a}} \left[ R(\mathbf{a}) - \widehat{R}_n(\mathbf{a}) - \psi_1 \lambda_\star(A^2) \|\mathbf{a}\|_2^2 \right].$$

As a consequence, for a small  $\varepsilon > 0$ , the following event  $\mathcal{E}_{\varepsilon, d}$  can be well-defined with high probability

$$\begin{aligned} \mathcal{E}_{\varepsilon, d} &= \left\{ \psi_1 \|\overline{\mathbf{a}}_U(\lambda_\star(A^2))\|_2^2 \geq A^2 - \varepsilon \right\} \cap \left\{ \hat{\lambda}(A^2 + \varepsilon) \leq \lambda_\star(A^2) \right\} \\ &= \left\{ A^2 - \varepsilon \leq \psi_1 \|\overline{\mathbf{a}}_U(\lambda_\star(A^2))\|_2^2 \leq A^2 + \varepsilon \right\}. \end{aligned}$$

Now, by Proposition 2, in the limit of Assumption 3, we have

$$\lim_{d \rightarrow \infty} \mathbb{P}_{\mathbf{X}, \Theta, \beta, \varepsilon}(\mathcal{E}_{\varepsilon, d}) = 1, \quad (51)$$

and we have

$$\mathcal{U}(\lambda_*(A^2), \psi_1, \psi_2) = \bar{\mathcal{U}}(\lambda_*(A^2), \psi_1, \psi_2) + o_{d, \mathbb{P}}(1). \quad (52)$$

By the strong duality as in Proposition 1, for any  $A^2 \in \Gamma_U$ , we have

$$U(A, N, n, d) = \bar{U}(\hat{\lambda}(A^2), N, n, d) + \hat{\lambda}(A^2)A^2.$$

Consequently, for small  $\varepsilon > 0$ , when the event  $\mathcal{E}_{\varepsilon, d}$  happens, we have

$$\begin{aligned} & U((A^2 + \varepsilon)^{1/2}, N, n, d) \\ &= \sup_{\mathbf{a}} \left( R(\mathbf{a}) - \hat{R}_n(\mathbf{a}) - \psi_1 \hat{\lambda}(A^2 + \varepsilon) \cdot (\|\mathbf{a}\|_2^2 - \psi_1^{-1}(A^2 + \varepsilon)) \right) \\ &\geq R(\bar{\mathbf{a}}_U(\lambda_*(A^2))) - \hat{R}_n(\bar{\mathbf{a}}_U(\lambda_*(A^2))) - \psi_1 \hat{\lambda}(A^2 + \varepsilon) \cdot (\|\bar{\mathbf{a}}_U(\lambda_*(A^2))\|_2^2 - \psi_1^{-1}(A^2 + \varepsilon)) \\ &\geq R(\bar{\mathbf{a}}_U(\lambda_*(A^2))) - \hat{R}_n(\bar{\mathbf{a}}_U(\lambda_*(A^2))) - \psi_1 \hat{\lambda}(A^2 + \varepsilon) \cdot (\|\bar{\mathbf{a}}_U(\lambda_*(A^2))\|_2^2 - \psi_1^{-1}(A^2 - \varepsilon)) \\ &\geq R(\bar{\mathbf{a}}_U(\lambda_*(A^2))) - \hat{R}_n(\bar{\mathbf{a}}_U(\lambda_*(A^2))) - \psi_1 \lambda_*(A^2) \cdot (\|\bar{\mathbf{a}}_U(\lambda_*(A^2))\|_2^2 - \psi_1^{-1}(A^2 - \varepsilon)) \\ &= \bar{U}(\lambda_*(A^2), N, n, d) + \lambda_*(A^2) \cdot (A^2 - \varepsilon). \end{aligned}$$

As a consequence, by Eq. (51) and (52), we have

$$U((A^2 + \varepsilon)^{1/2}, N, n, d) \geq \bar{\mathcal{U}}(\lambda_*(A^2), \psi_1, \psi_2) + \lambda_*(A^2) \cdot (A^2 - \varepsilon) - o_{d, \mathbb{P}}(1) = \mathcal{U}(A, \psi_1, \psi_2) - \varepsilon \lambda_*(A^2) - o_{d, \mathbb{P}}(1).$$

where the last equality is by the definition of  $\mathcal{U}$  as in Definition 2, and by the fact that  $\lambda_*(A^2) \in \arg \min_{\lambda \geq 0} [\bar{\mathcal{U}}(\lambda, \psi_1, \psi_2) + \lambda A^2]$ . Taking  $\varepsilon$  sufficiently small proves the lower bound. This concludes the proof of Theorem 1.

## F. Technical background

In this section we introduce additional technical background useful for the proofs. In particular, we will use decompositions in (hyper-)spherical harmonics on the  $\mathbb{S}^{d-1}(\sqrt{d})$  and in Hermite polynomials on the real line. We refer the readers to (Efthimiou & Frye, 2014; Szego, Gabor, 1939; Chihara, 2011; Ghorbani et al., 2019; Mei & Montanari, 2019) for further information on these topics.

### F.1. Functional spaces over the sphere

For  $d \geq 1$ , we let  $\mathbb{S}^{d-1}(r) = \{\mathbf{x} \in \mathbb{R}^d : \|\mathbf{x}\|_2 = r\}$  denote the sphere with radius  $r$  in  $\mathbb{R}^d$ . We will mostly work with the sphere of radius  $\sqrt{d}$ ,  $\mathbb{S}^{d-1}(\sqrt{d})$  and will denote by  $\gamma_d$  the uniform probability measure on  $\mathbb{S}^{d-1}(\sqrt{d})$ . All functions in the following are assumed to be elements of  $L^2(\mathbb{S}^{d-1}(\sqrt{d}), \gamma_d)$ , with scalar product and norm denoted as  $\langle \cdot, \cdot \rangle_{L^2}$  and  $\|\cdot\|_{L^2}$ :

$$\langle f, g \rangle_{L^2} \equiv \int_{\mathbb{S}^{d-1}(\sqrt{d})} f(\mathbf{x}) g(\mathbf{x}) \gamma_d(d\mathbf{x}). \quad (53)$$

For  $\ell \in \mathbb{Z}_{\geq 0}$ , let  $\tilde{V}_{d, \ell}$  be the space of homogeneous harmonic polynomials of degree  $\ell$  on  $\mathbb{R}^d$  (i.e. homogeneous polynomials  $q(\mathbf{x})$  satisfying  $\Delta q(\mathbf{x}) = 0$ ), and denote by  $V_{d, \ell}$  the linear space of functions obtained by restricting the polynomials in  $\tilde{V}_{d, \ell}$  to  $\mathbb{S}^{d-1}(\sqrt{d})$ . With these definitions, we have the following orthogonal decomposition

$$L^2(\mathbb{S}^{d-1}(\sqrt{d}), \gamma_d) = \bigoplus_{\ell=0}^{\infty} V_{d, \ell}. \quad (54)$$

The dimension of each subspace is given by

$$\dim(V_{d, \ell}) = B(d, \ell) = \frac{2\ell + d - 2}{\ell} \binom{\ell + d - 3}{\ell - 1}. \quad (55)$$

For each  $\ell \in \mathbb{Z}_{\geq 0}$ , the spherical harmonics  $\{Y_{\ell j}^{(d)}\}_{1 \leq j \leq B(d, \ell)}$  form an orthonormal basis of  $V_{d, \ell}$ :

$$\langle Y_{ki}^{(d)}, Y_{sj}^{(d)} \rangle_{L^2} = \delta_{ij} \delta_{ks}.$$

Note that our convention is different from the more standard one, that defines the spherical harmonics as functions on  $\mathbb{S}^{d-1}(1)$ . It is immediate to pass from one convention to the other by a simple scaling. We will drop the superscript  $d$  and write  $Y_{\ell, j} = Y_{\ell, j}^{(d)}$  whenever clear from the context.

We denote by  $P_k$  the orthogonal projections to  $V_{d, k}$  in  $L^2(\mathbb{S}^{d-1}(\sqrt{d}), \gamma_d)$ . This can be written in terms of spherical harmonics as

$$P_k f(\mathbf{x}) \equiv \sum_{l=1}^{B(d, k)} \langle f, Y_{kl} \rangle_{L^2} Y_{kl}(\mathbf{x}). \quad (56)$$

Then for a function  $f \in L^2(\mathbb{S}^{d-1}(\sqrt{d}))$ , we have

$$f(\mathbf{x}) = \sum_{k=0}^{\infty} P_k f(\mathbf{x}) = \sum_{k=0}^{\infty} \sum_{l=1}^{B(d, k)} \langle f, Y_{kl} \rangle_{L^2} Y_{kl}(\mathbf{x}).$$

## F.2. Gegenbauer polynomials

The  $\ell$ -th Gegenbauer polynomial  $Q_{\ell}^{(d)}$  is a polynomial of degree  $\ell$ . Consistently with our convention for spherical harmonics, we view  $Q_{\ell}^{(d)}$  as a function  $Q_{\ell}^{(d)} : [-d, d] \rightarrow \mathbb{R}$ . The set  $\{Q_{\ell}^{(d)}\}_{\ell \geq 0}$  forms an orthogonal basis on  $L^2([-d, d], \tilde{\tau}_d)$  (where  $\tilde{\tau}_d$  is the distribution of  $\langle \mathbf{x}_1, \mathbf{x}_2 \rangle$  when  $\mathbf{x}_1, \mathbf{x}_2 \sim_{i.i.d.} \text{Unif}(\mathbb{S}^{d-1}(\sqrt{d}))$ ), satisfying the normalization condition:

$$\langle Q_k^{(d)}, Q_j^{(d)} \rangle_{L^2(\tilde{\tau}_d)} = \frac{1}{B(d, k)} \delta_{jk}. \quad (57)$$

In particular, these polynomials are normalized so that  $Q_{\ell}^{(d)}(d) = 1$ . As above, we will omit the superscript  $d$  when clear from the context (write it as  $Q_{\ell}$  for notation simplicity).

Gegenbauer polynomials are directly related to spherical harmonics as follows. Fix  $\mathbf{v} \in \mathbb{S}^{d-1}(\sqrt{d})$  and consider the subspace of  $V_{\ell}$  formed by all functions that are invariant under rotations in  $\mathbb{R}^d$  that keep  $\mathbf{v}$  unchanged. It is not hard to see that this subspace has dimension one, and coincides with the span of the function  $Q_{\ell}^{(d)}(\langle \mathbf{v}, \cdot \rangle)$ .

We will use the following properties of Gegenbauer polynomials

1. For  $\mathbf{x}, \mathbf{y} \in \mathbb{S}^{d-1}(\sqrt{d})$

$$\langle Q_j^{(d)}(\langle \mathbf{x}, \cdot \rangle), Q_k^{(d)}(\langle \mathbf{y}, \cdot \rangle) \rangle_{L^2(\mathbb{S}^{d-1}(\sqrt{d}), \gamma_d)} = \frac{1}{B(d, k)} \delta_{jk} Q_k^{(d)}(\langle \mathbf{x}, \mathbf{y} \rangle). \quad (58)$$

2. For  $\mathbf{x}, \mathbf{y} \in \mathbb{S}^{d-1}(\sqrt{d})$

$$Q_k^{(d)}(\langle \mathbf{x}, \mathbf{y} \rangle) = \frac{1}{B(d, k)} \sum_{i=1}^{B(d, k)} Y_{ki}^{(d)}(\mathbf{x}) Y_{ki}^{(d)}(\mathbf{y}). \quad (59)$$

Note in particular that property 2 implies that –up to a constant–  $Q_k^{(d)}(\langle \mathbf{x}, \mathbf{y} \rangle)$  is a representation of the projector onto the subspace of degree- $k$  spherical harmonics

$$(P_k f)(\mathbf{x}) = B(d, k) \int_{\mathbb{S}^{d-1}(\sqrt{d})} Q_k^{(d)}(\langle \mathbf{x}, \mathbf{y} \rangle) f(\mathbf{y}) \gamma_d(d\mathbf{y}). \quad (60)$$

For a function  $\sigma \in L^2([-\sqrt{d}, \sqrt{d}], \tau_d)$  (where  $\tau_d$  is the distribution of  $\langle \mathbf{x}_1, \mathbf{x}_2 \rangle / \sqrt{d}$  when  $\mathbf{x}_1, \mathbf{x}_2 \sim_{iid} \text{Unif}(\mathbb{S}^{d-1}(\sqrt{d}))$ ), denoting its spherical harmonics coefficients  $\lambda_{d,k}(\sigma)$  to be

$$\lambda_{d,k}(\sigma) = \int_{[-\sqrt{d}, \sqrt{d}]} \sigma(x) Q_k^{(d)}(\sqrt{d}x) \tau_d(x), \quad (61)$$

then we have the following equation holds in  $L^2([-\sqrt{d}, \sqrt{d}], \tau_d)$  sense

$$\sigma(x) = \sum_{k=0}^{\infty} \lambda_{d,k}(\sigma) B(d, k) Q_k^{(d)}(\sqrt{d}x). \quad (62)$$

### F.3. Hermite polynomials

The Hermite polynomials  $\{\text{He}_k\}_{k \geq 0}$  form an orthogonal basis of  $L^2(\mathbb{R}, \mu_G)$ , where  $\mu_G(dx) = e^{-x^2/2} dx / \sqrt{2\pi}$  is the standard Gaussian measure, and  $\text{He}_k$  has degree  $k$ . We will follow the classical normalization (here and below, expectation is with respect to  $G \sim \mathcal{N}(0, 1)$ ):

$$\mathbb{E}\{\text{He}_j(G) \text{He}_k(G)\} = k! \delta_{jk}. \quad (63)$$

As a consequence, for any function  $\sigma \in L^2(\mathbb{R}, \mu_G)$ , we have the decomposition

$$\sigma(x) = \sum_{k=1}^{\infty} \frac{\mu_k(\sigma)}{k!} \text{He}_k(x), \quad \mu_k(\sigma) \equiv \mathbb{E}\{\sigma(G) \text{He}_k(G)\}. \quad (64)$$

The Hermite polynomials can be obtained as high-dimensional limits of the Gegenbauer polynomials introduced in the previous section. Indeed, the Gegenbauer polynomials (up to a  $\sqrt{d}$  scaling in domain) are constructed by Gram-Schmidt orthogonalization of the monomials  $\{x^k\}_{k \geq 0}$  with respect to the measure  $\tau_d$ , while Hermite polynomial are obtained by Gram-Schmidt orthogonalization with respect to  $\mu_G$ . Since  $\tau_d \Rightarrow \mu_G$  (here  $\Rightarrow$  denotes weak convergence), it is immediate to show that, for any fixed integer  $k$ ,

$$\lim_{d \rightarrow \infty} \text{Coeff}\{Q_k^{(d)}(\sqrt{d}x) B(d, k)^{1/2}\} = \text{Coeff}\left\{\frac{1}{(k!)^{1/2}} \text{He}_k(x)\right\}. \quad (65)$$

Here and below, for  $P$  a polynomial,  $\text{Coeff}\{P(x)\}$  is the vector of the coefficients of  $P$ . As a consequence, for any fixed integer  $k$ , we have

$$\mu_k(\sigma) = \lim_{d \rightarrow \infty} \lambda_{d,k}(\sigma) (B(d, k) k!)^{1/2}, \quad (66)$$

where  $\mu_k(\sigma)$  and  $\lambda_{d,k}(\sigma)$  are given in Eq. (64) and (61).
